# Supplementary material for: Impact of linking groups in chelating bis-carbene iridium catalysts for transfer hydrogenation of inorganic carbonates with glycerol
Source: Royal Society of Chemistry journal article supplement (doi:10.1039/d5gc05119c), 2026-01-01
Supplement: d5gc05119c1.pdf [file d5gc05119c1.pdf]

**Supporting information for:**

**Impact of Linking Groups in Chelating Bis-carbene Iridium Catalysts for Transfer Hydrogenation of Inorganic Carbonates with Glycerol**

Marvin L. Richter, Eduardo Peris and Sergio Gonell\*

Institute of Advanced Materials (INAM), Centro de Innovación en Química Avanzada  
(ORFEO-CINQA)

Universitat Jaume I

Av. Vicente Sos Baynat s/n. Castellón, E-12071 (Spain)

|                                                                                                                           |           |
|---------------------------------------------------------------------------------------------------------------------------|-----------|
| <b>1. Experimental Details</b>                                                                                            | <b>2</b>  |
| 1.1. General considerations                                                                                               | 2         |
| 1.2. Synthesis of <sup>Me</sup> Ph-Ir <sup>+</sup>                                                                        | 2         |
| 1.4. Synthesis of <sup>Me</sup> C <sub>2</sub> H <sub>4</sub> -Ir <sup>+</sup>                                            | 3         |
| <b>2. NMR spectra</b>                                                                                                     | <b>4</b>  |
| 2.1 <sup>1</sup> H, <sup>13</sup> C and HSQC NMR spectra of <sup>Me</sup> Ph-Ir <sup>+</sup>                              | 4         |
| 2.2 <sup>1</sup> H, <sup>13</sup> C and HSQC NMR spectra of [ <sup>Me</sup> C <sub>2</sub> H <sub>4</sub> -Ir][Br]        | 5         |
| 2.3 <sup>1</sup> H, <sup>13</sup> C, and HSQC NMR spectra of <sup>Me</sup> C <sub>2</sub> H <sub>4</sub> -Ir <sup>+</sup> | 7         |
| <b>3. IR Spectra</b>                                                                                                      | <b>9</b>  |
| <b>4. Electrochemical methods</b>                                                                                         | <b>11</b> |
| 4.1. Electrochemical measurements                                                                                         | 11        |
| 4.2 Electrochemical kinetic analysis                                                                                      | 12        |
| <b>5. Catalytical experiments</b>                                                                                         | <b>14</b> |
| 5.1 Catalytical measurements                                                                                              | 14        |
| 5.2 Catalytic Results                                                                                                     | 16        |
| <b>6. Crystallographic methods</b>                                                                                        | <b>20</b> |
| <b>7. References</b>                                                                                                      | <b>29</b> |

## 1. Experimental Details

**1.1. General considerations** All operations were carried out by using standard Schlenk techniques under nitrogen atmosphere unless otherwise stated.<sup>[1]</sup> MeCN and CH<sub>2</sub>Cl<sub>2</sub> were dried and degassed with a solvent purification system (SPS M BRAUN). The other solvents were used as received from commercial suppliers and kept under air.

D<sub>2</sub>O and DMSO-*d*<sub>6</sub> were purchased from Cambridge Isotope Laboratories Inc. and used as received. [Ph-bis-mim-H<sub>2</sub>][PF<sub>6</sub>]<sub>2</sub>,<sup>[2]</sup> [C<sub>2</sub>H<sub>4</sub>-bis-mim-H<sub>2</sub>][Br]<sub>2</sub>,<sup>[3]</sup> [C<sub>2</sub>H<sub>4</sub>-bis-mim-H<sub>2</sub>][PF<sub>6</sub>]<sub>2</sub>,<sup>[3]</sup> [IrCl(COD)]<sub>2</sub><sup>[4]</sup> and <sup>Me</sup>Im-Ir<sup>2+</sup><sup>[5]</sup> were synthesized according to reported procedures. Ba(OH)<sub>2</sub>·8H<sub>2</sub>O (≥99.9% purity), K<sub>2</sub>CO<sub>3</sub> (99% purity), and glycerol (≥99.5% purity) were acquired from Merck and used as received.

All other materials were commercially available and used as received, unless otherwise noted. NMR spectra were recorded on a Bruker 300 MHz or 400 MHz spectrometer at 30 °C. Chemical shifts are reported with respect to residual organic solvents.<sup>[6]</sup>

Infrared spectra (FTIR) were recorded on a Bruker Equinox 55 spectrometer with a spectral window of 4000-400 cm<sup>-1</sup>. Electrospray mass spectra (ESI-MS) were recorded on a Micromass Quatro LC instrument; nitrogen was employed as drying and nebulizing gas. Exact mass analyses were recorded by using a Q-TOF Premier mass spectrometer with an electrospray source (Waters, Manchester, UK) operating at a resolution of about 16000 FWHM.

**1.2. Synthesis of <sup>Me</sup>Ph-Ir<sup>+</sup>.** [IrCl(COD)]<sub>2</sub> (50 mg, 74.4 μmol, 1.0 eq.), NaOAc (54 mg, 0.658 mmol, 8.8 eq.) and [Ph-bis-mim-H<sub>2</sub>][PF<sub>6</sub>]<sub>2</sub> (80 mg, 0.151 mmol, 2.0 eq.) were dissolved in acetonitrile (20 mL). The solution was heated upon reflux for 2 h changing the colour from yellow to red. After cooling to room temperature, the suspension was filtrated *via* an oven-dried cannula fitted with a paper filter, and then the solvent was removed *in vacuo*. 15 mL of DCM were added to the solid, and the suspension was filtrated over a 0.2 μm Nylon-filter. CO gas was bubbled through the solution for 10 minutes, while a change of colour to yellow was observed. Precipitation with pentane and the subsequent recrystallization through slow diffusion of pentane into a saturated solution of the crude in DCM enabled the isolation of the desired product as yellow crystals (49.0 mg, 77.6 μmol, 52% yield). <sup>1</sup>H NMR (400 MHz, DMSO-*d*<sub>6</sub>): δ = 7.90 (d, 2 H, <sup>3</sup>J<sub>H-H</sub> = 2.0 Hz, CH<sub>Im</sub>), 7.79 (d, 2 H, <sup>3</sup>J<sub>H-H</sub> = 2.0 Hz, CH<sub>Im</sub>), 7.74 (m, 4 H, CH<sub>Ph</sub>), 3.89 (s, 6 H, CH<sub>3</sub>) ppm. <sup>13</sup>C {<sup>1</sup>H} NMR (101 MHz, DMSO-*d*<sub>6</sub>): δ = 181.6

(Ir–CO), 168.9 (Ir–C), 131.8 ( $C_{Ph}$ ), 130.4 ( $CH_{Ph}$ ), 127.4 ( $CH_{Ph}$ ), 125.2 ( $CH_{Im}$ ), 124.7 ( $CH_{Im}$ ), 38.4 ( $NCH_3$ ) ppm. HRMS (ESI,  $m/z$ ): 487.0756 [ $M-PF_6$ ]<sup>+</sup> (calculated: 487.0746).

**1.4. Synthesis of  $^{Me}C_2H_4-Ir^+$ .** This compound can be synthesized following two different synthetic approaches, which provide the same complex but with different counter ions. **Method A** ( $PF_6^-$  counter-anion,  $^{Me}C_2H_4-Ir^+$ ):  $[C_2H_4-bis-mim-H_2][PF_6]_2$  (72 mg, 0.149 mmol, 2.0 eq.), NaOAc (50 mg, 0.610 mmol, 8.2 eq.) and  $[IrCl(COD)]_2$  (50 mg, 74.4  $\mu$ mol, 1.0 eq.) were dissolved in 20 mL acetonitrile and heated upon reflux for 3 h. The red solution was dried *in vacuo* and extracted *via* an oven-dried cannula fitted with a filter paper (20 mL DCM). CO gas was bubbled through the solution, and an immediate darkening was observed. After 10 min, the solution turned green, and the crude was precipitated by adding 30 mL of pentane. The solution was decanted, and the residue extracted with DCM (3 x 3 mL) and filtrated over a 0.2  $\mu$ m Nylon-filter. After drying *in vacuo*, the product was isolated as a dark yellow powder (47 mg, 80.6  $\mu$ mol, 54% yield).  $^1H$  NMR (400 MHz, DMSO- $d_6$ ):  $\delta$  = 7.53 (d, 2 H,  $^3J_{H-H}$  = 1.9 Hz,  $CH_{Im}$ ), 7.51 (d, 2 H,  $^3J_{H-H}$  = 1.9 Hz,  $CH_{Im}$ ), 5.16–4.34 (bd, 4 H  $CH_2$ ), 3.80 (s, 6 H,  $CH_3$ ) ppm.  $^{13}C$  { $^1H$ } NMR (101 MHz, DMSO- $d_6$ ):  $\delta$  = 181.5 (Ir–CO), 165.3 (Ir–C), 124.2 ( $CH_{Im}$ ), 123.7 ( $CH_{Im}$ ), 47.5 ( $CH_2$ ), 38.6 ( $CH_3$ ) ppm. HRMS (ESI,  $m/z$ ): 439.0757 [ $M-PF_6$ ]<sup>+</sup> (calculated: 439.0746). **Method B** ( $Br^-$  counter-anion,  $[^{Me}C_2H_4-Ir][Br]$ ):  $[C_2H_4-bis-mim-H_2][Br]_2$  (115 mg, 0.327 mmol, 2.0 eq.) and  $Ag_2O$  (91 mg, 0.393 mmol, 1.2 eq.) were suspended in DCM (20 mL), and the solution was stirred overnight at room temperature in the absence of light.  $[IrCl(COD)]_2$  (110 mg, 0.164 mmol, 1.0 eq.) was added and the solution was heated upon reflux for 4 h. Under aerobic conditions, the red solution was filtrated through celite, and CO gas was bubbled through the solution at 0 °C for 10 min, changing the colour of the solution to yellow. The crude was precipitated with hexane and the solid collected by filtration. Crystallization, by slow diffusion of hexane into a solution of the crude in acetone at 5 °C, enabled the isolation of  $[^{Me}C_2H_4-Ir][Br]$  as a crystalline yellow powder (43 mg, 82.9  $\mu$ mol, 25% yield).  $^1H$  NMR (400 MHz, DMSO- $d_6$ ):  $\delta$  = 7.53 (s, 2 H,  $CH_{Im}$ ), 7.52 (s, 2 H,  $CH_{Im}$ ), 4.87 (bm, 2 H,  $NCH_2$ ), 4.61 (bm, 2 H,  $NCH_2$ ), 3.80 (s, 6 H,  $CH_3$ ) ppm.  $^{13}C$  { $^1H$ } NMR (101 MHz, DMSO- $d_6$ ):  $\delta$  = 181.5 (Ir–CO), 165.2 (Ir–C), 124.2 ( $CH_{Im}$ ), 123.8 ( $CH_{Im}$ ), 47.5 ( $CH_2$ ), 38.6 ( $CH_3$ ) ppm. HRMS (ESI,  $m/z$ ): 439.0751 [ $M-Br$ ]<sup>+</sup> (calculated: 439.0746).

## 2. NMR spectra

### 2.1 $^1\text{H}$ , $^{13}\text{C}$ and HSQC NMR spectra of $^{\text{Me}}\text{Ph-Ir}^+$

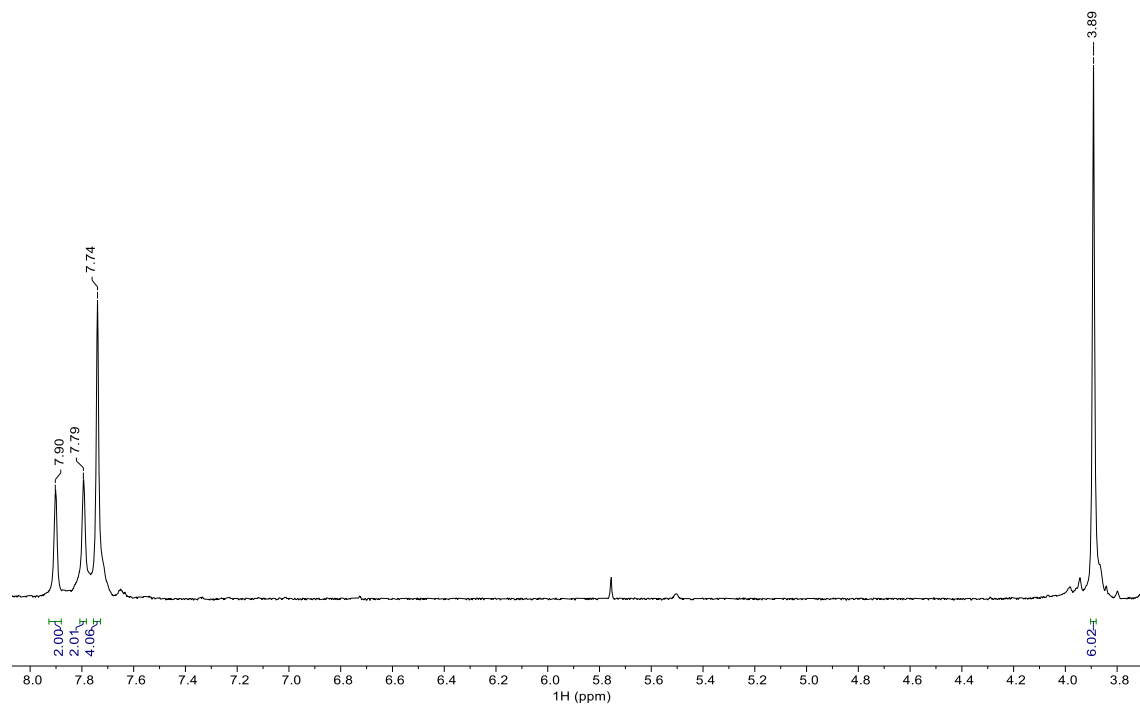

**Figure S1.**  $^1\text{H}$  NMR spectrum of  $^{\text{Me}}\text{Ph-Ir}^+$  in  $\text{DMSO-}d_6$ , 400 MHz.

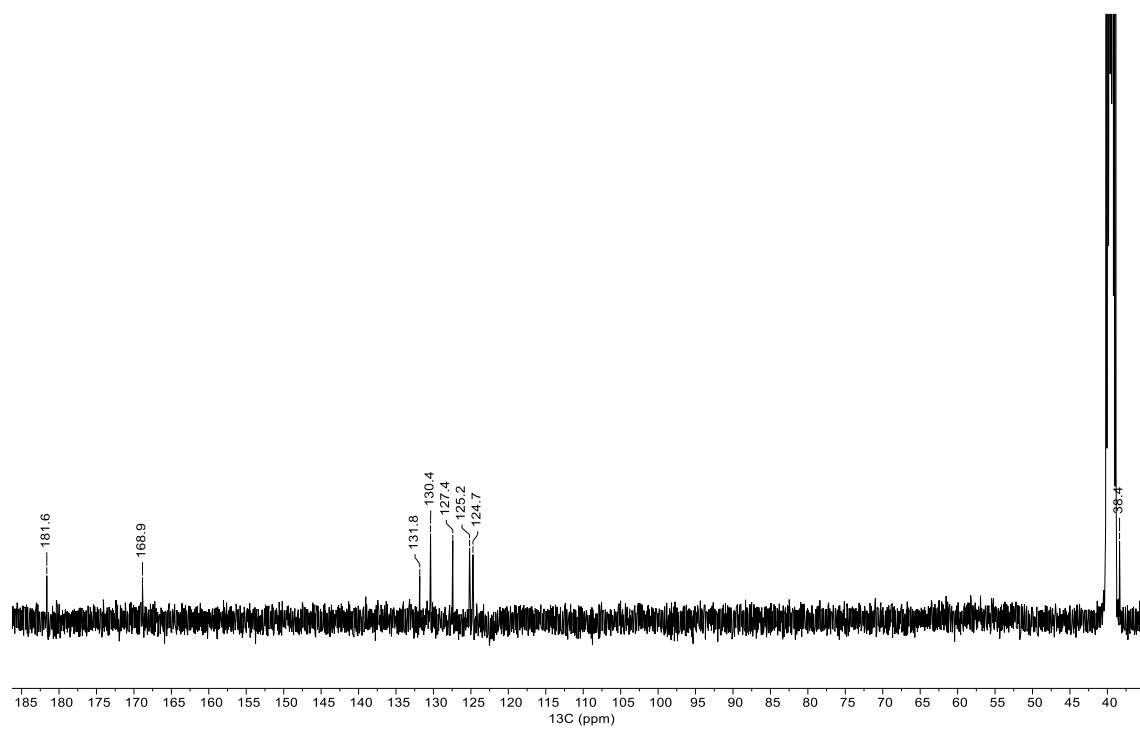

**Figure S2.**  $^{13}\text{C}$   $\{^1\text{H}\}$  NMR spectrum of  $^{\text{Me}}\text{Ph-Ir}^+$  in  $\text{DMSO-}d_6$ , 101 MHz.

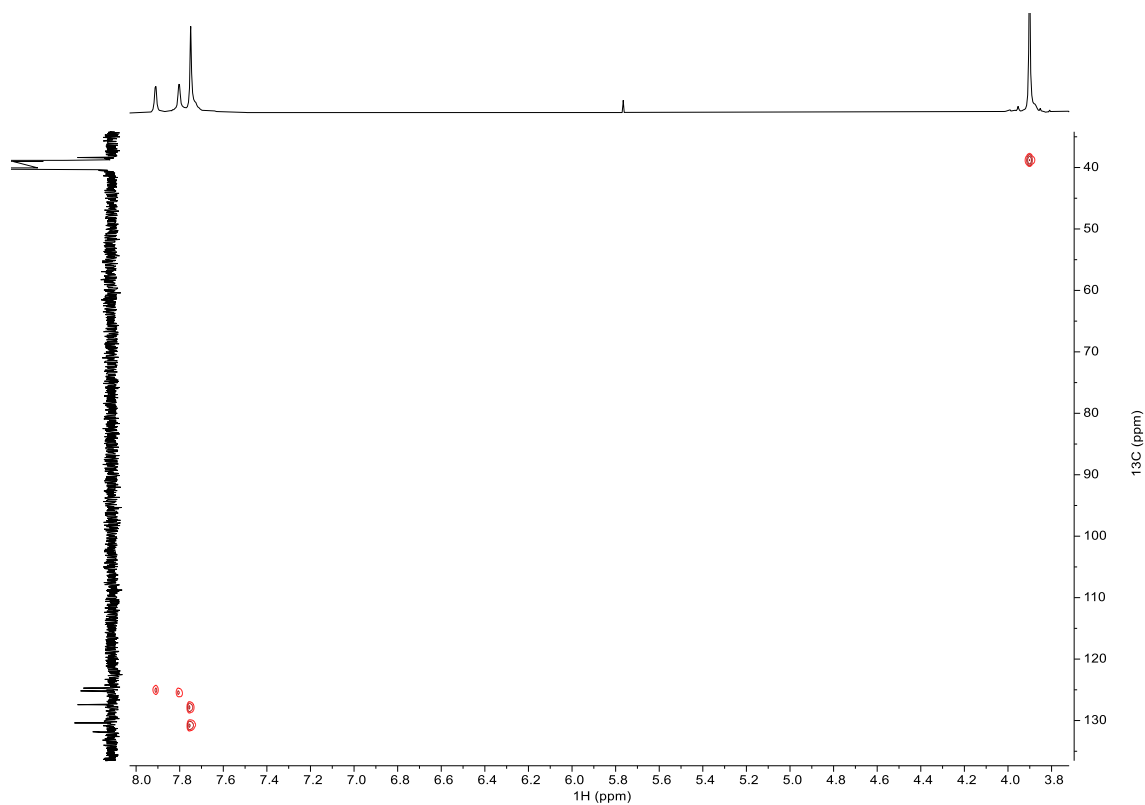

**Figure S3.**  $^1\text{H}$ - $^{13}\text{C}$  HSQC NMR spectrum of  $^{\text{Me}}\text{Ph-Ir}^+$  in  $\text{DMSO-}d_6$ , 400 MHz.

## 2.2 $^1\text{H}$ , $^{13}\text{C}$ and HSQC NMR spectra of $[\text{MeC}_2\text{H}_4\text{-Ir}][\text{Br}]$

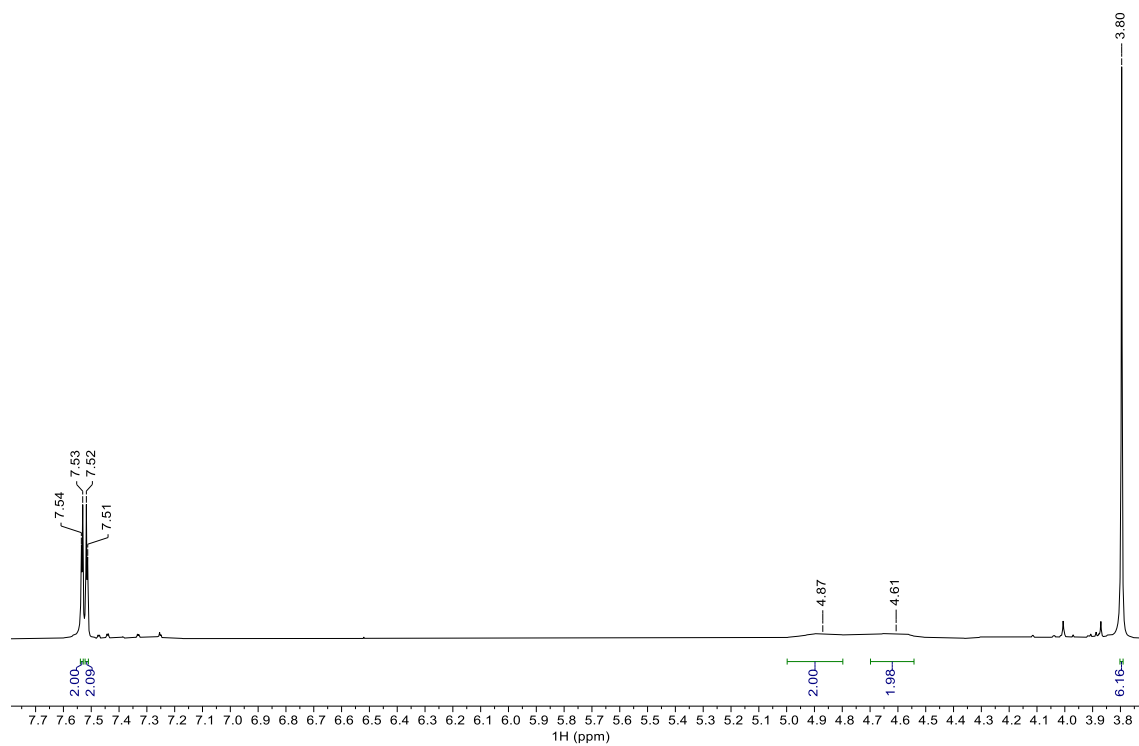

**Figure S4.**  $^1\text{H}$  NMR spectrum of  $[\text{MeC}_2\text{H}_4\text{-Ir}][\text{Br}]$  in  $\text{DMSO-}d_6$ , 400 MHz.

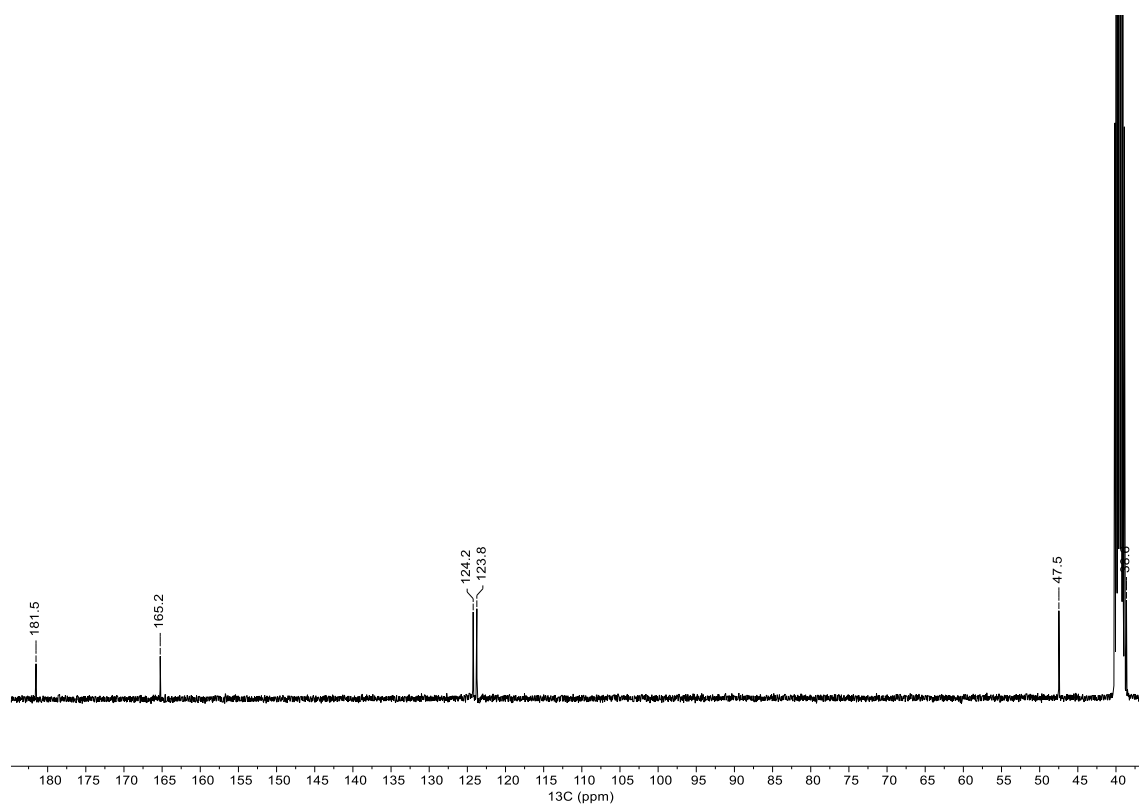

**Figure S5.**  $^{13}\text{C}$   $\{^1\text{H}\}$  NMR spectrum of  $[\text{MeC}_2\text{H}_4\text{-Ir}][\text{Br}]$  in  $\text{DMSO-}d_6$ , 101 MHz.

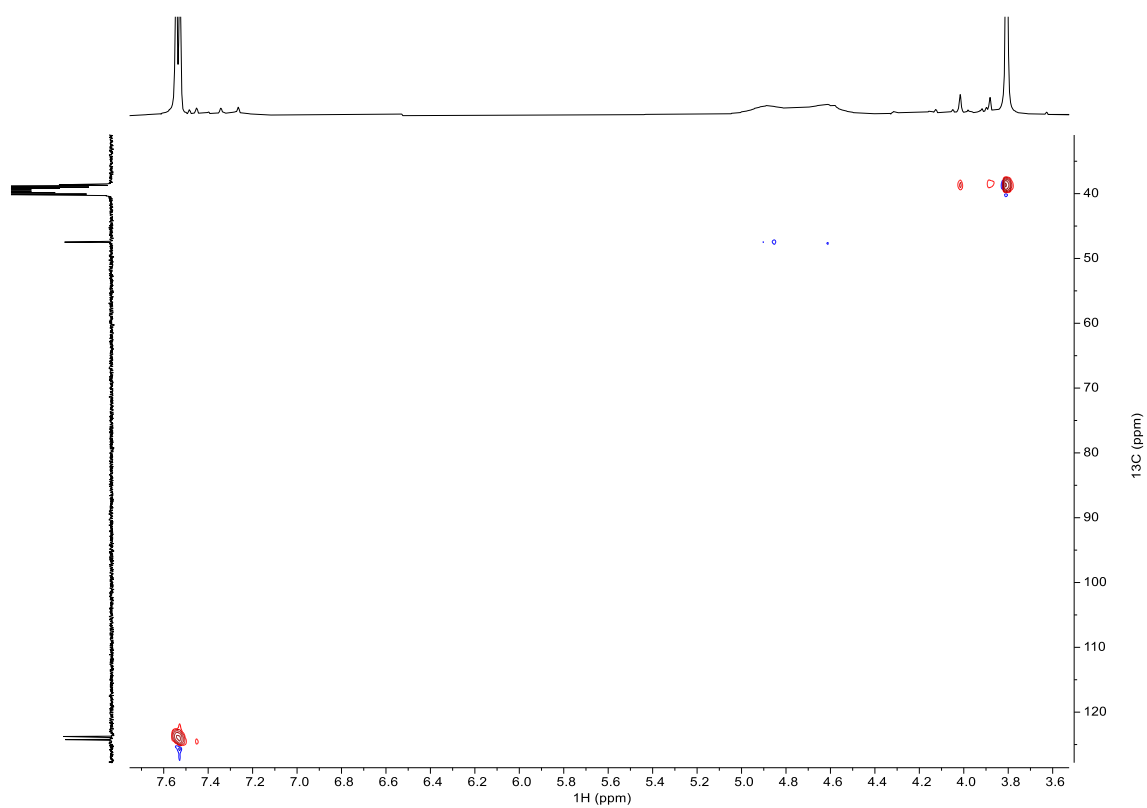

**Figure S6.**  $^1\text{H}$ - $^{13}\text{C}$  HSQC NMR spectrum of  $[\text{MeC}_2\text{H}_4\text{-Ir}][\text{Br}]$  in  $\text{DMSO-}d_6$ , 400 MHz.

### 2.3 $^1\text{H}$ , $^{13}\text{C}$ , and HSQC NMR spectra of $^{\text{Me}}\text{C}_2\text{H}_4\text{-Ir}^+$

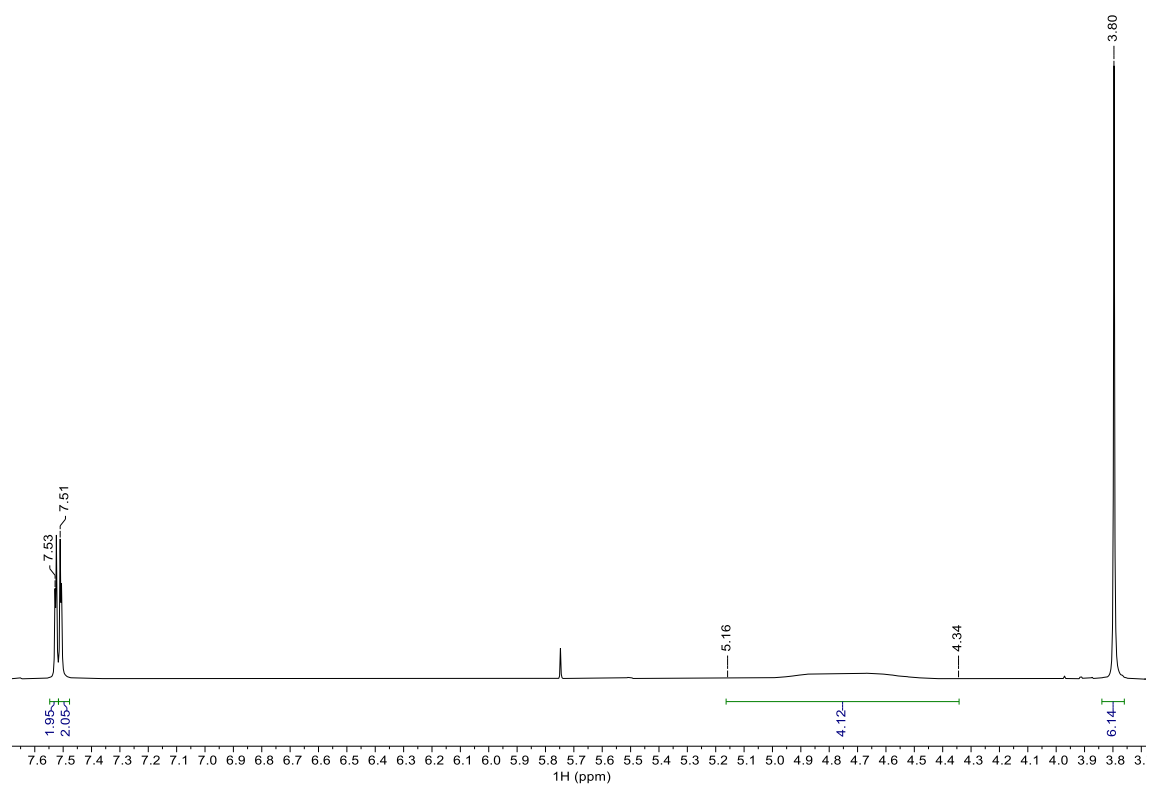

**Figure S7.**  $^1\text{H}$  NMR spectrum of  $^{\text{Me}}\text{C}_2\text{H}_4\text{-Ir}^+$  in  $\text{DMSO-}d_6$ , 400 MHz.

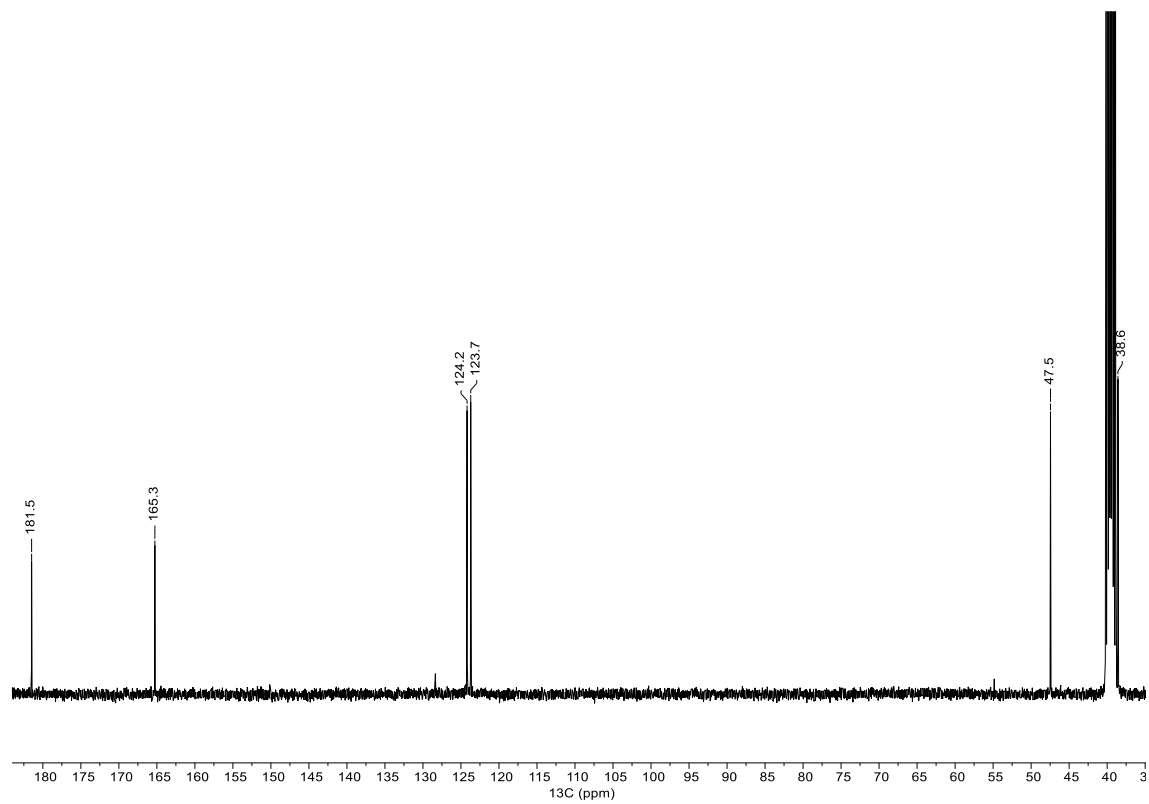

**Figure S8.**  $^{13}\text{C}$   $\{^1\text{H}\}$  NMR spectrum of  $^{\text{Me}}\text{C}_2\text{H}_4\text{-Ir}^+$  in  $\text{DMSO-}d_6$ , 101 MHz.

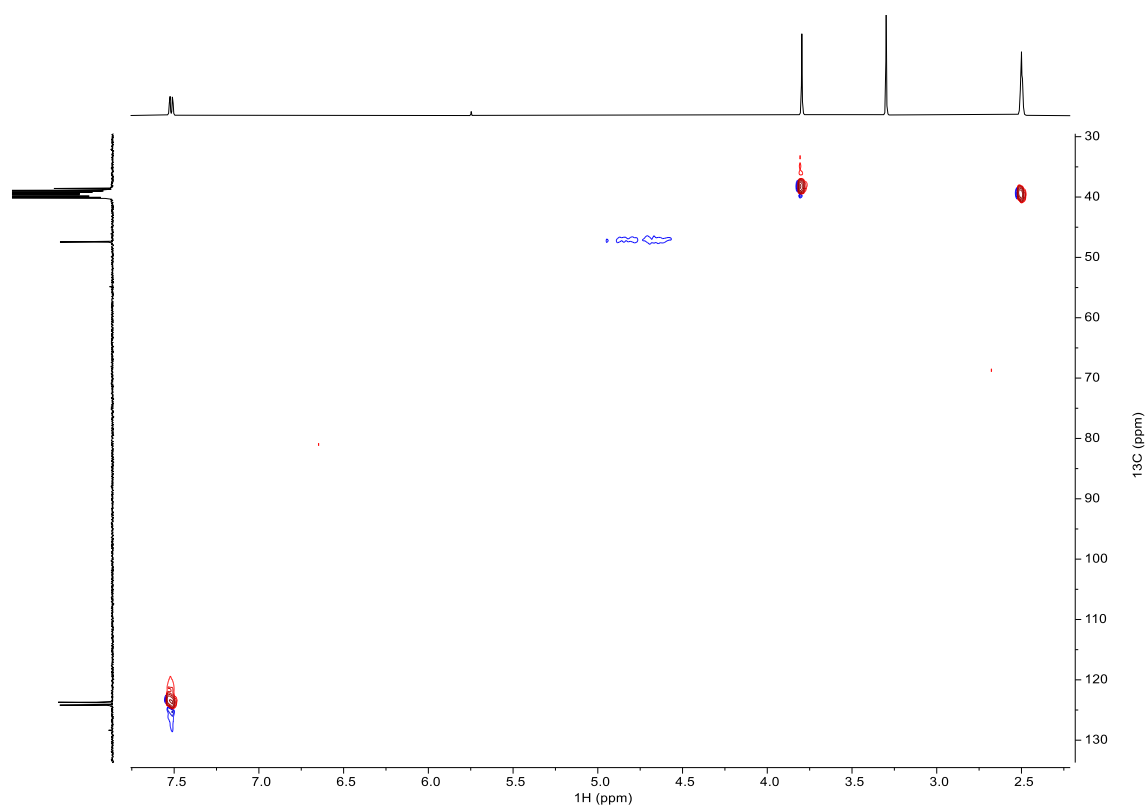

**Figure S9.**  $^1\text{H}$ - $^{13}\text{C}$  HSQC NMR spectrum of  $\text{MeC}_2\text{H}_4\text{-Ir}^+$  in  $\text{DMSO-}d_6$ , 400 MHz.



### 3. IR Spectra

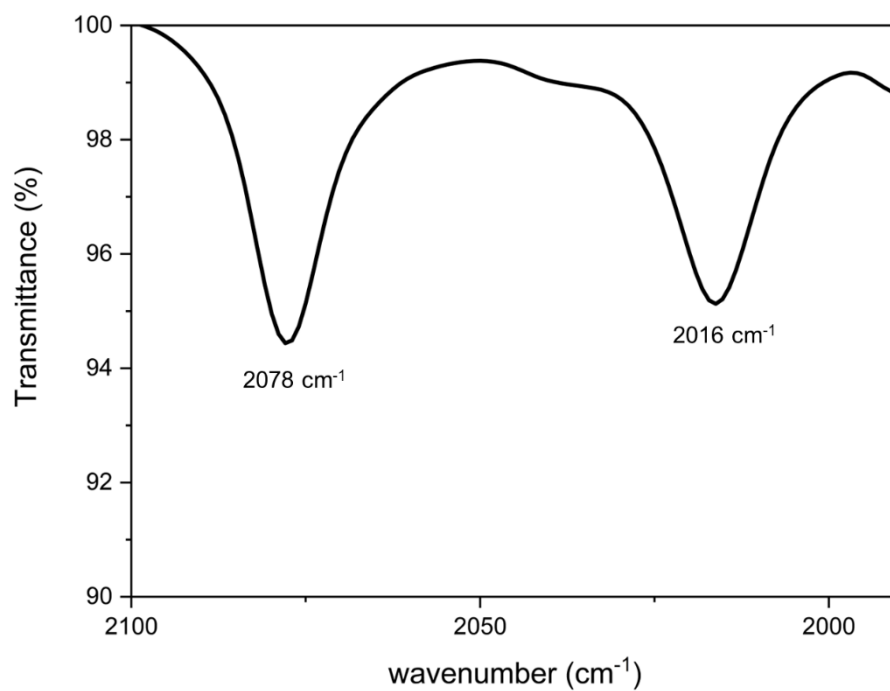

**Figure S10.** IR spectrum of  $\text{MeIm-Ir}^{2+}$  in acetonitrile.

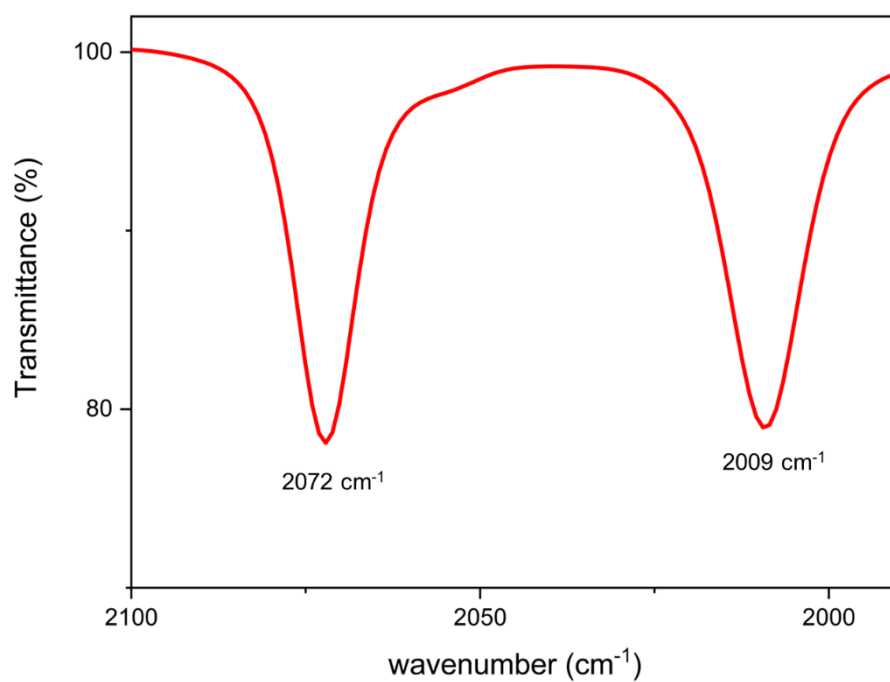

**Figure S11.** IR spectrum of  $\text{MePh-Ir}^{+}$  in acetonitrile.

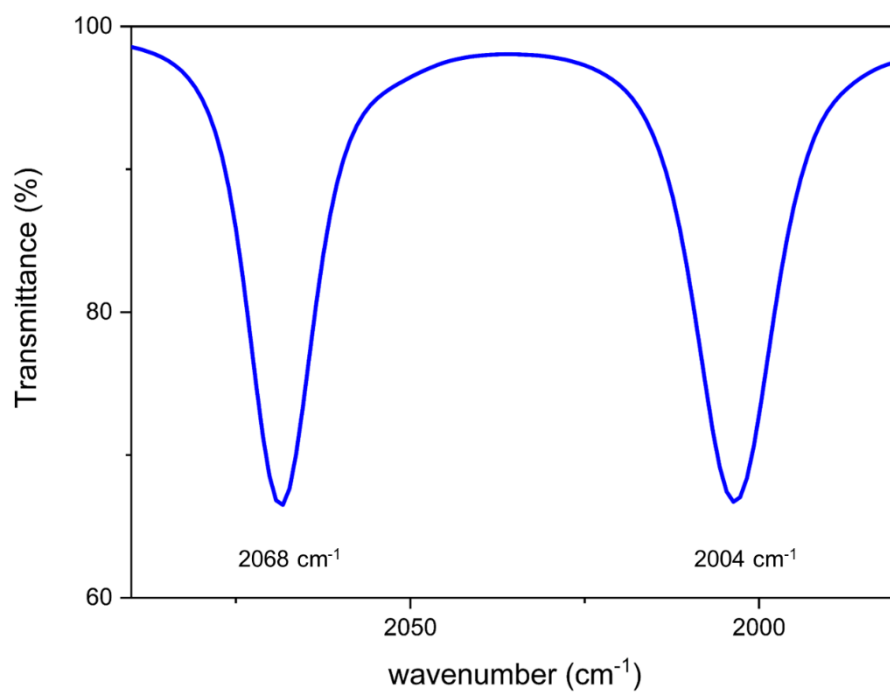

**Figure S12.** IR spectrum of  $[\text{MeC}_2\text{H}_4\text{-Ir}][\text{Br}]$  in acetonitrile.

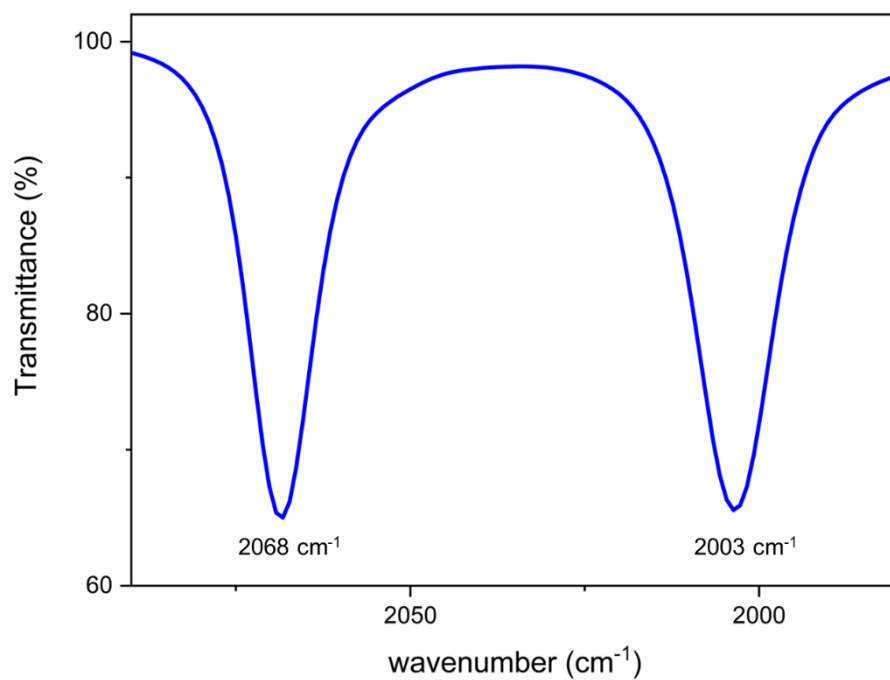

**Figure S13.** IR spectrum of  $\text{MeC}_2\text{H}_4\text{-Ir}^+$  in acetonitrile.

## 4. Electrochemical methods

### 4.1. Electrochemical measurements

Electrochemical studies were performed using an Autolab Potentiostat, Model PGSTAT101 controlled with NOVA 2.1.6 software. All the solutions were deoxygenated by sparging with Ar for at least 15 min. Tetrabutylammonium hexafluorophosphate (TBAPF<sub>6</sub>, Sigma Aldrich, electrochemical grade) was used as electrolyte (100 mM) in all experiments. MeCN was dried and degassed with a solvent purification system (SPS M BRAUN, < 20 ppm residual H<sub>2</sub>O, measured by Karl Fischer titration).

Cyclic voltammetry was performed in an undivided three-electrode cell with a 3 mm diameter disk glassy carbon working electrode, a platinum counter electrode, and a silver wire pseudo-reference electrode. The glassy carbon working electrode (CH Instruments) was polished between scans with 0.05- $\mu$ m alumina powder (CH Instruments, contained no agglomeration agents) before rinsing with miliQ water and acetone. All scans were referenced to the ferrocenium/ferrocene (Fc<sup>+</sup>/Fc) couple at 0 V. Ferrocene was present in each scan. Ohmic drop was minimized by minimizing the distance between the working and reference electrodes. The residual ohmic drop was estimated by positive feedback and compensated at 90%.

The normalized scan rate dependent CVs were built taking into account the Randles–Sevcik equation, dividing the current of the sweep by the square root of the scan rate. The Randles–Sevcik equation describes how the peak current  $i_p$  (A) increases linearly with the square root of the scan rate  $v$  (V·s<sup>-1</sup>), for an electrochemically reversible electron transfer process involving freely diffusing species.  $n$  is the number of electrons transferred in the redox event,  $A$  (cm<sup>2</sup>) is the electrode surface area,  $D_0$  (cm<sup>2</sup>·s<sup>-1</sup>) is the diffusion coefficient of the analyte, and  $C^0$  (mol·cm<sup>-3</sup>) is the bulk concentration of the analyte.

$$i_p = 0.446nFAC^0 \left( \frac{nFvD_0}{RT} \right)^{1/2} \text{ (Eq. S1)}$$

## 4.2 Electrochemical kinetic analysis

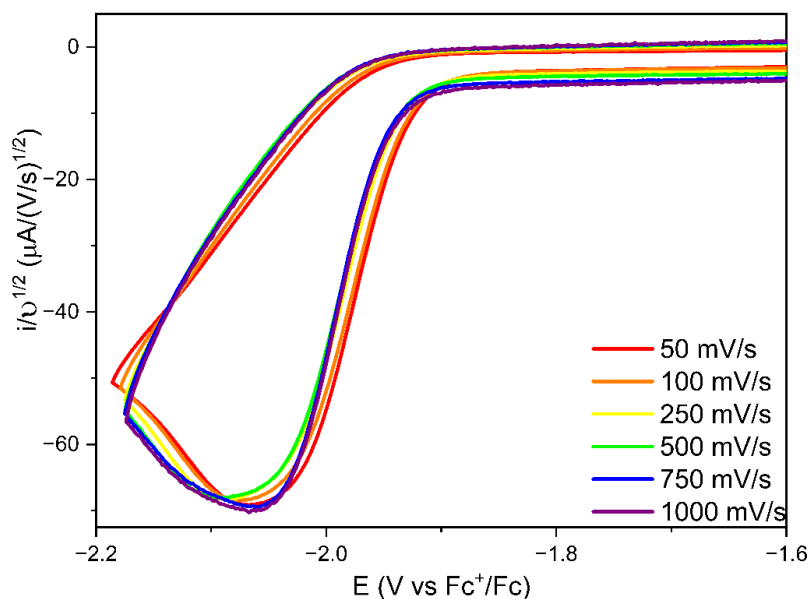

**Figure S14.** Normalized CV of  $\text{MeC}_2\text{H}_4\text{-Ir}^+$  under Ar in MeCN from 50 mV/s to 1000 mV/s. Conditions: Ar atmosphere, MeCN,  $[\text{Ir}] = 1 \text{ mM}$ ,  $[\text{TBAPF}_6] = 100 \text{ mM}$ , 3 mm glassy carbon disc working electrode, Pt wire counter electrode, Ag wire pseudo-reference electrode.

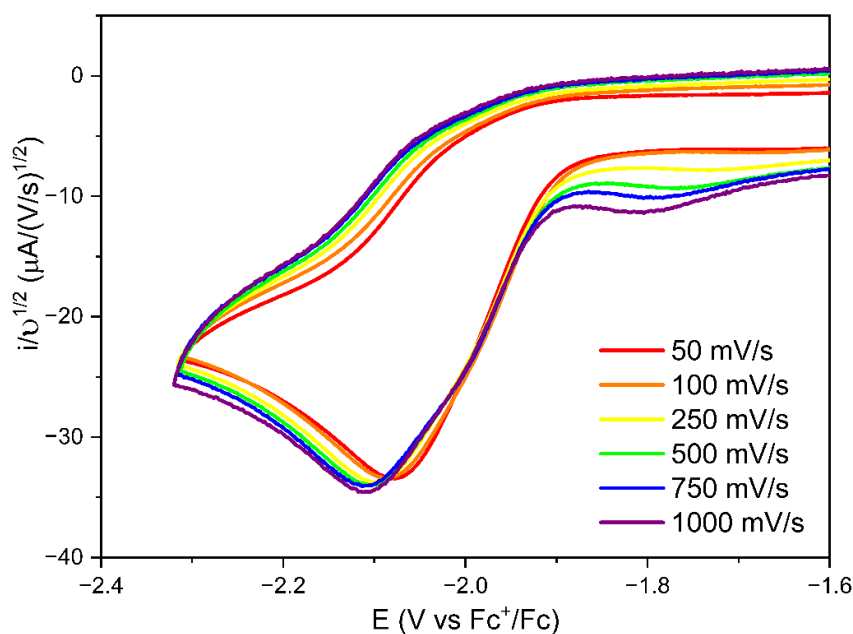

**Figure S15.** Normalized CV of  $\text{MePh-Ir}^+$  under Ar in MeCN from 50 mV/s to 1000 mV/s. Conditions: Ar atmosphere, MeCN,  $[\text{Ir}] = 1 \text{ mM}$ ,  $[\text{TBAPF}_6] = 100 \text{ mM}$ , 3 mm glassy carbon disc working electrode, Pt wire counter electrode, Ag wire pseudo-reference electrode.

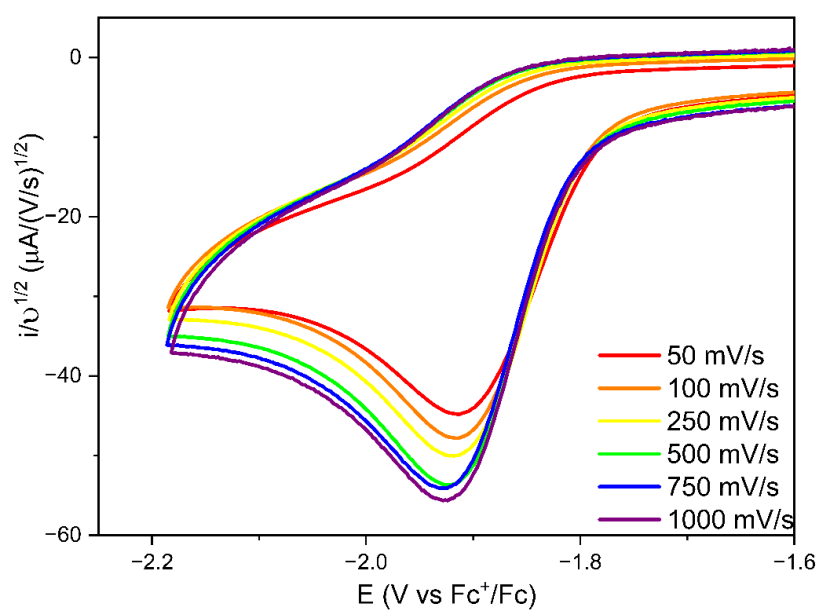

**Figure S16.** Normalized CV of  $\text{MeIm-Ir}^{2+}$  under Ar in MeCN from 50 mV/s to 1000 mV/s. Conditions: Ar atmosphere, MeCN,  $[\text{Ir}] = 1 \text{ mM}$ ,  $[\text{TBAPF}_6] = 100 \text{ mM}$ , 3 mm glassy carbon disc working electrode, Pt wire counter electrode, Ag wire pseudo-reference electrode.

## 5. Catalytical experiments

### 5.1 Catalytical measurements

All measurements were performed under an atmosphere of N<sub>2</sub>. MiliQ water was utilized to prepare the stock solution of the complexes for the catalytic experiments. Glycerol was degassed by sonicating it under vacuum for 1 h then flushing it with N<sub>2</sub> and repeating this procedure two more times. Then it was stored under nitrogen in a Schlenk tube. Each experiment was performed at least twice to get a mean and a standard deviation.

4 mmol of K<sub>2</sub>CO<sub>3</sub> (553 mg) or Ba(OH)<sub>2</sub>·8H<sub>2</sub>O (1.262 g) were placed either in a Schlenk tube or in a high pressure Schlenk tube fitted with a Teflon cap. The Schlenk tubes were additionally fitted with a reflux condenser and a gas bubbler during the experiment, while the Schlenk tubes fitted with a Teflon cap were sealed. 50 µL stock solution of the catalyst in water (1.5–2.8 mM) were added to the glycerol solution, enabling a catalyst loading between 35 and 280 nmol. When the catalyst was insoluble in water, it was added first to the flask in a stock solution in DCM, dried *in vacuo* and then 50 µL of miliQ water were added. Finally, 1 mL of Glycerol was added. The mixtures were heated to 180 °C for the appropriate amount of time (1–6 or 24 h). Afterwards, the mixture was cooled to room temperature, 9 mL of a stock solution of isonicotinic acid in water (5.3–7.7 mM) was added and, if needed, the mixture was shortly heated with a heat gun to ensure homogeneity. 450 µL of this mixture and 150 µL of D<sub>2</sub>O were placed in an NMR tube and measured at a 400 MHz Bruker device with a delay time of 20 s and 32 scans. An example of the typically obtained <sup>1</sup>H spectrum is shown in Figure S17.

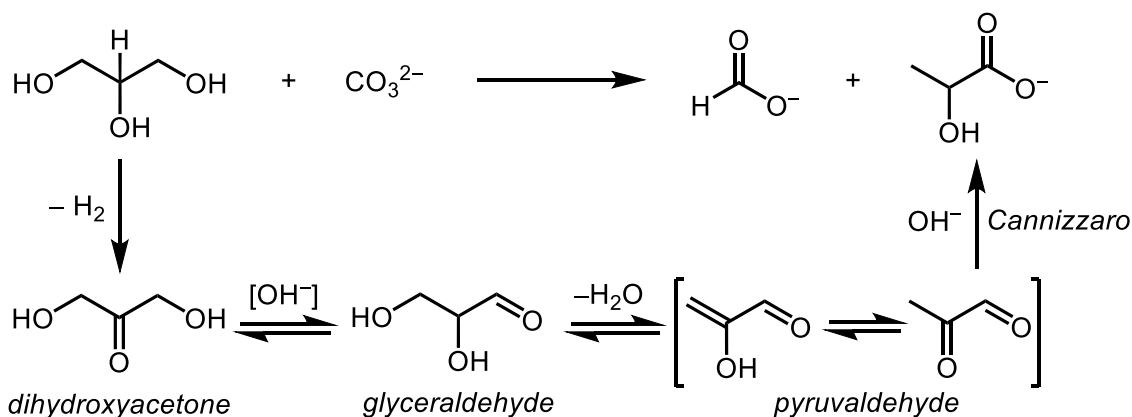

**Scheme S1.** Overall reactions involved in the transfer hydrogenation of inorganic carbonates with glycerol.

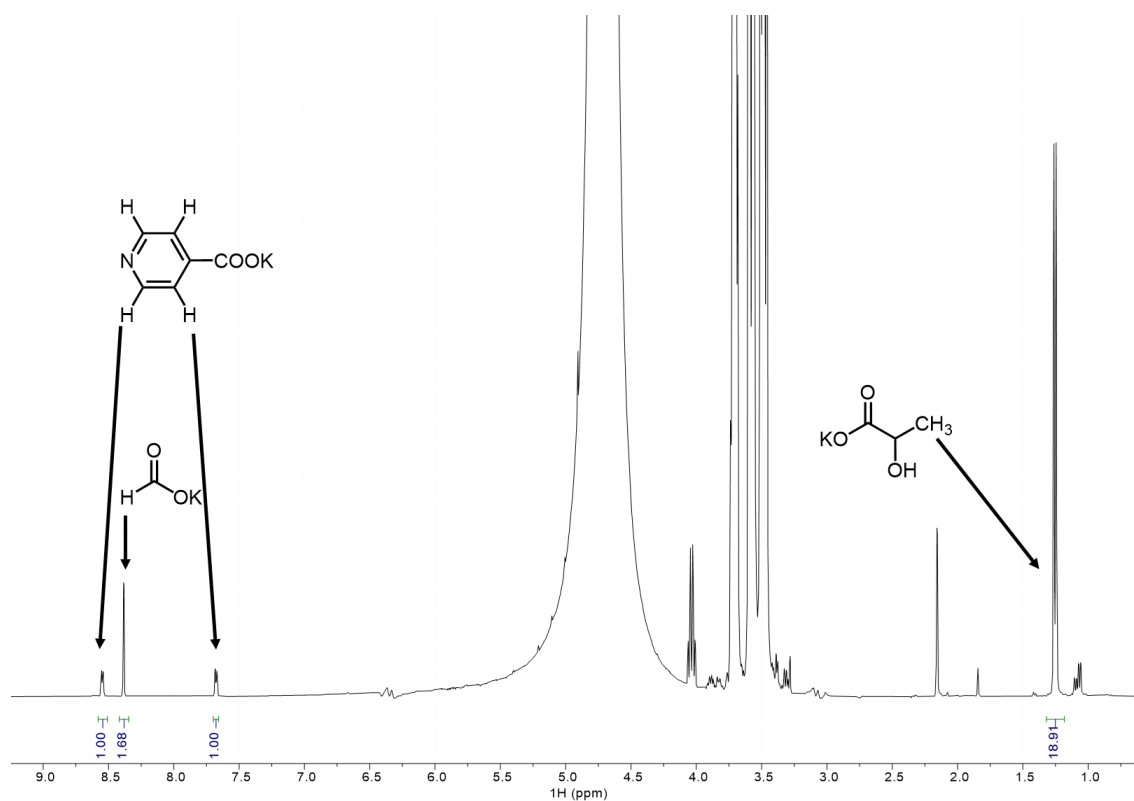

**Figure S17.** Exemplary  $^1\text{H}$  NMR spectrum of a catalytic reaction, showing the peaks utilized to calculate the TON (isonicotinate standard, deprotonated due to the basic nature of the mixture, formate and the  $\text{CH}_3$ -group of lactate). Due to the overlap with the wide peak of water, the CH-peak of lactate was not integrated. The spectrum was not referenced to the shift of the solvent.

## 5.2 Catalytic Results

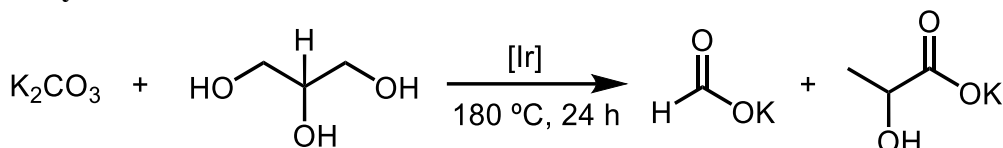

**Table S1.** Results of the transfer hydrogenation of  $\text{K}_2\text{CO}_3$  with glycerol.<sup>a</sup>

| Entry          | Catalyst                                           | TON formate [ $10^3$ ] | TON lactate [ $10^4$ ] |
|----------------|----------------------------------------------------|------------------------|------------------------|
| 1 <sup>b</sup> | <b>MeIm-Ir<sup>2+</sup></b>                        | $7.04 \pm 2.04$        | $1.56 \pm 0.36$        |
| 2 <sup>b</sup> | <b>MePh-Ir<sup>+</sup></b>                         | $5.05 \pm 0.87$        | $1.98 \pm 0.22$        |
| 3 <sup>b</sup> | <b>MeC<sub>2</sub>H<sub>4</sub>-Ir<sup>+</sup></b> | $3.80 \pm 1.05$        | $1.61 \pm 0.07$        |
| 4 <sup>b</sup> | <b>[MeC<sub>2</sub>H<sub>4</sub>-Ir][Br]</b>       | $4.32 \pm 1.48$        | $1.90 \pm 0.27$        |
| 5 <sup>c</sup> | <b>MeIm-Ir<sup>2+</sup></b>                        | $7.23 \pm 2.31$        | $1.63 \pm 0.52$        |
| 6 <sup>c</sup> | <b>MePh-Ir<sup>+</sup></b>                         | $2.62 \pm 0.90$        | $1.83 \pm 0.46$        |
| 7 <sup>c</sup> | <b>MeC<sub>2</sub>H<sub>4</sub>-Ir<sup>+</sup></b> | $1.91 \pm 0.21$        | $1.47 \pm 0.03$        |
| 8 <sup>c</sup> | <b>[MeC<sub>2</sub>H<sub>4</sub>-Ir][Br]</b>       | $1.98 \pm 1.59$        | $2.13 \pm 0.31$        |

<sup>a</sup>Reaction conditions: Glycerol (1 mL),  $\text{K}_2\text{CO}_3$  (4 mmol), 0.14  $\mu\text{mol}$  of Ir catalyst in 50  $\mu\text{L}$  of  $\text{H}_2\text{O}$ , 180  $^\circ\text{C}$ , 24 h. <sup>b</sup>Performed in a high pressure Schlenk tube fitted with a Teflon cap. <sup>c</sup>Performed in a Schlenk tube fitted with a reflux condenser and a bubbler.

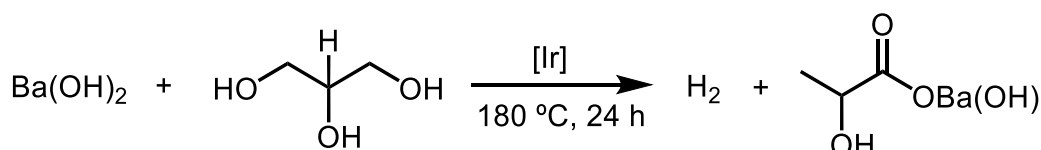

**Table S2.** Results of glycerol dehydrogenation of  $\text{Ba}(\text{OH})_2$ .<sup>a</sup>

| Entry          | Catalyst                                           | TON lactate [ $10^4$ ] |
|----------------|----------------------------------------------------|------------------------|
| 1 <sup>b</sup> | <b>MeIm-Ir<sup>2+</sup></b>                        | $5.71 \pm 0.82$        |
| 2 <sup>b</sup> | <b>MePh-Ir<sup>+</sup></b>                         | $5.64 \pm 0.36$        |
| 3 <sup>b</sup> | <b>MeC<sub>2</sub>H<sub>4</sub>-Ir<sup>+</sup></b> | $5.65 \pm 0.87$        |
| 4 <sup>b</sup> | <b>[MeC<sub>2</sub>H<sub>4</sub>-Ir][Br]</b>       | $5.74 \pm 0.79$        |
| 5 <sup>c</sup> | <b>MeIm-Ir<sup>2+</sup></b>                        | $5.34 \pm 0.26$        |
| 6 <sup>c</sup> | <b>MePh-Ir<sup>+</sup></b>                         | $3.82 \pm 1.30$        |
| 7 <sup>c</sup> | <b>MeC<sub>2</sub>H<sub>4</sub>-Ir<sup>+</sup></b> | $3.36 \pm 1.81$        |
| 8 <sup>c</sup> | <b>[MeC<sub>2</sub>H<sub>4</sub>-Ir][Br]</b>       | $4.73 \pm 0.89$        |

<sup>a</sup>Reaction conditions: Glycerol (1 mL),  $\text{Ba}(\text{OH})_2 \cdot 8\text{H}_2\text{O}$  (4 mmol), 0.14  $\mu\text{mol}$  of Ir catalyst in 50  $\mu\text{L}$  of  $\text{H}_2\text{O}$ , 180  $^\circ\text{C}$ , 24 h.

<sup>b</sup>Performed in a high pressure Schlenk tube fitted with a Teflon cap. <sup>c</sup>Performed in a Schlenk tube fitted with a reflux condenser and a bubbler.



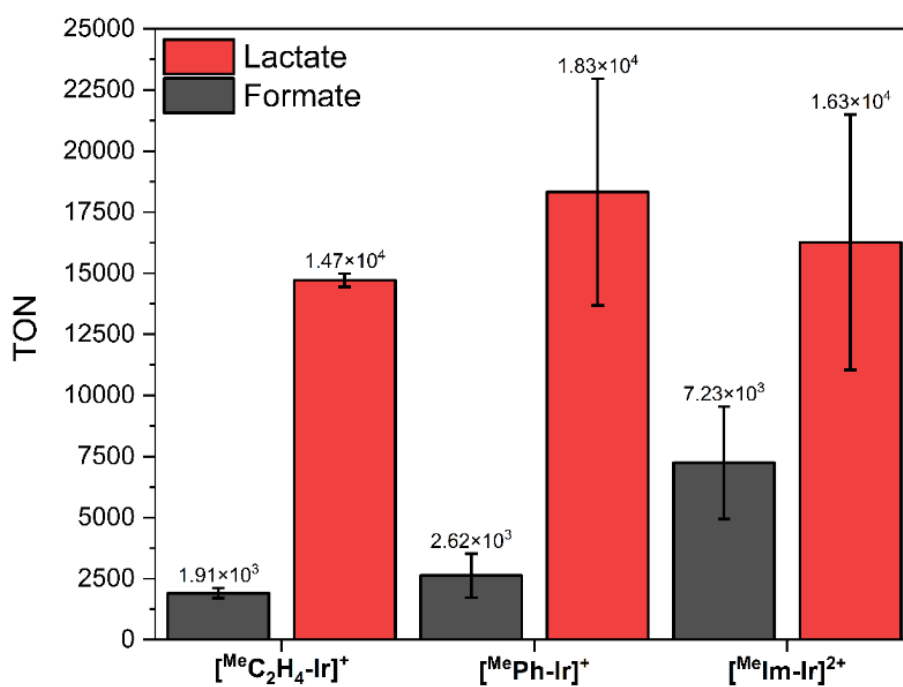

**Figure S18.** Results of the transfer hydrogenation of  $\text{K}_2\text{CO}_3$  with glycerol in an open vessel. Reaction conditions: Glycerol (1 mL),  $\text{K}_2\text{CO}_3$  (4 mmol), 0.14  $\mu\text{mol}$  of Ir catalyst in 50  $\mu\text{L}$  of  $\text{H}_2\text{O}$ , 180  $^\circ\text{C}$ , 24 h. Reactions performed in a Schlenk tube fitted with condenser and a bubbler. TONs obtained from the average of at least two independent runs. Uncertainty represents the standard deviation.

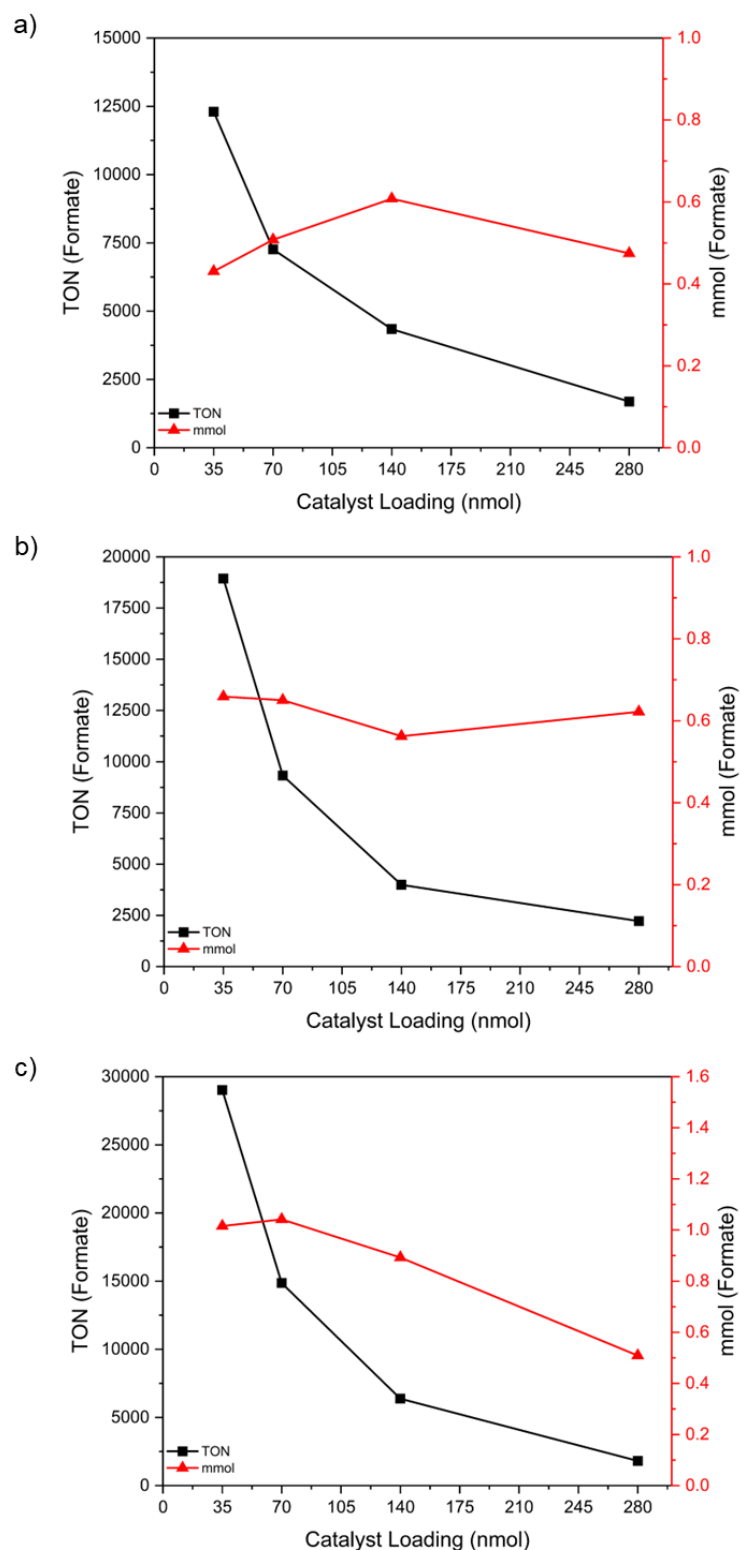

**Figure S19.** Results of the transfer hydrogenation of  $\text{K}_2\text{CO}_3$  with glycerol for the generation of formate in a closed vessel, utilizing different catalyst loadings of  $\text{MeC}_2\text{H}_4\text{-Ir}^+$  (a),  $\text{MePh-Ir}^{2+}$  (b) or  $\text{MeIm-Ir}^{2+}$  (c). Reaction conditions: Glycerol (1 mL),  $\text{K}_2\text{CO}_3$  (4 mmol), 0.14  $\mu\text{mol}$  of Ir catalyst in 50  $\mu\text{L}$  of  $\text{H}_2\text{O}$ , 180  $^\circ\text{C}$ , 24 h. Reactions performed in a high pressure Schlenk tube fitted with a Teflon cap

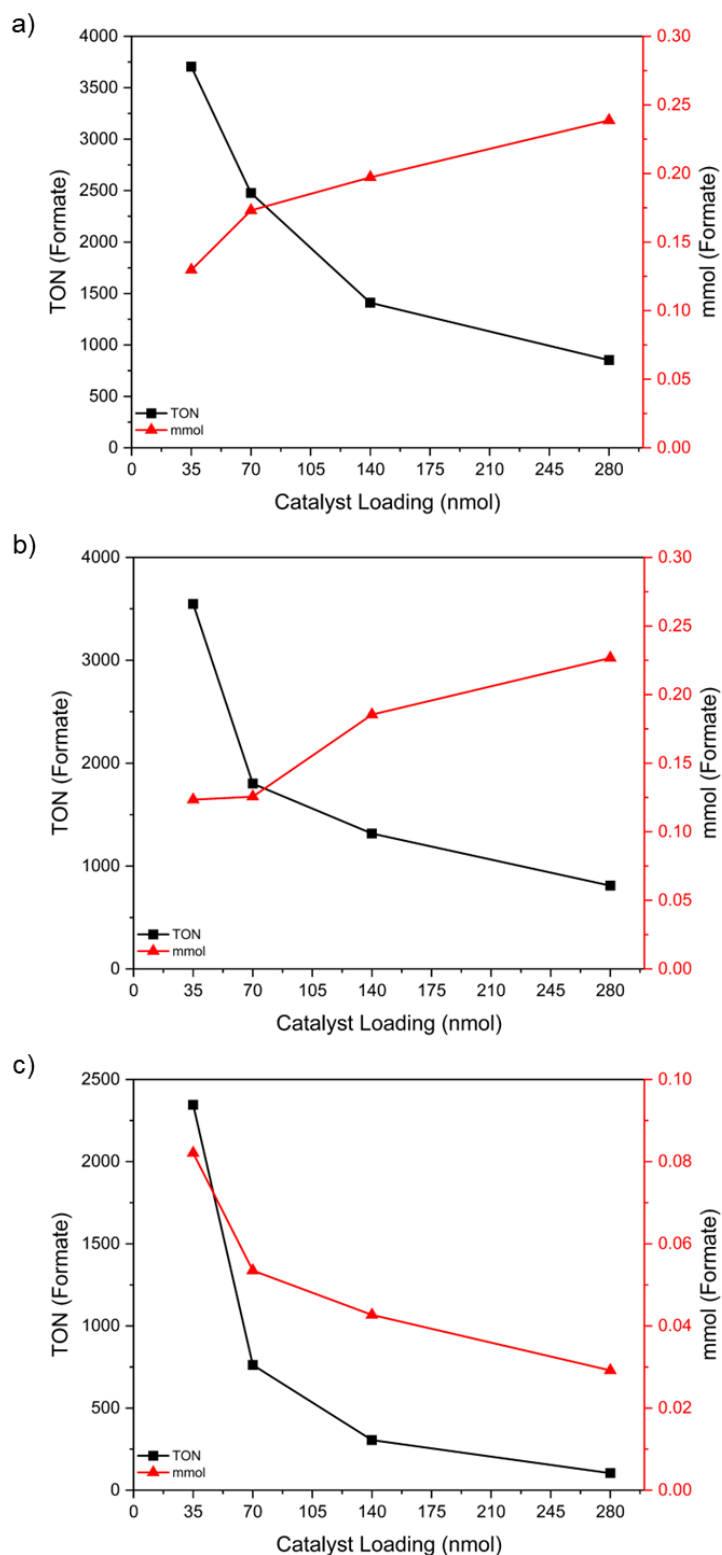

**Figure S20.** Results of the transfer hydrogenation of  $K_2CO_3$  with glycerol for the generation of formate in a closed vessel, utilizing different catalyst loadings of  $MeC_2H_4-Ir^+$  (a),  $MePh-Ir^{2+}$  (b) or  $MeIm-Ir^{2+}$  (c). Reaction conditions: Glycerol (1 mL),  $K_2CO_3$  (4 mmol), 0.14  $\mu$ mol of Ir catalyst in 50  $\mu$ L of  $H_2O$ , 180  $^\circ$ C, 1 h. Reactions performed in a high pressure Schlenk tube fitted with a Teflon cap.

## 6. Crystallographic methods

Single-crystal X-ray diffraction data were collected on an Agilent SuperNova diffractometer equipped with an Atlas CCD detector using Cu-K $\alpha$  radiation ( $\lambda = 1.54184$  Å). Single crystals were mounted on a MicroMount<sup>®</sup> polymer tip (MiteGen) in a random orientation. The structures were solved by direct methods using SHELXS and refined with SHELXL<sup>[7]</sup> with least squares minimization using the Olex2 software package.<sup>[8]</sup> Data were corrected for absorption effects using the Multi-Scan and the Gaussian method. Non-hydrogen atoms were refined anisotropically. The hydrogen atoms were placed in geometrically calculated positions with Uiso = 1.2Uequiv of the parent atom (Uiso = 1.5Uequiv for methyl). Key details of the crystals and structure refinement data are summarized in Supplementary Tables S3 to S11. Further crystallographic details may be found in the CIF files, which were deposited at the Cambridge Crystallographic Data Centre, Cambridge, UK. The reference numbers for compounds **MeIm-Ir<sup>2+</sup>**, **MePh-Ir<sup>+</sup>** and [**MeC<sub>2</sub>H<sub>4</sub>-Ir**][Br] were assigned as 2465664, 2465665 and 2465666, respectively.

Suitable crystals of **MeIm-Ir<sup>2+</sup>**, **MePh-Ir<sup>+</sup>** and [**MeC<sub>2</sub>H<sub>4</sub>-Ir**][Br] for X-ray diffraction experiments were obtained by slow diffusion of pentane into a saturated solution of the iridium complexes in acetone. For **MeIm-Ir<sup>2+</sup>**, the diffusion of pentane was in the gas phase and the crystallization took place at room temperature. For [**MeC<sub>2</sub>H<sub>4</sub>-Ir**][Br], the same approach was followed, but at low temperature. For **MePh-Ir<sup>+</sup>**, the two solvents were layered, and the diffusion took place at low temperature.

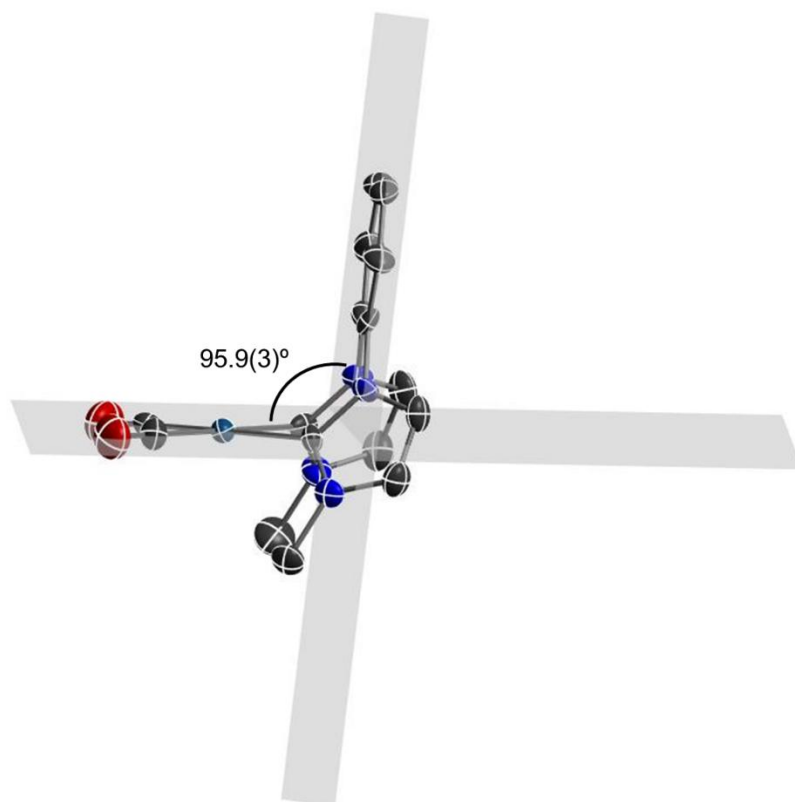

**Figure S21.** Side-on view of the molecular structure of  $\text{MePh-Ir}^+$  displaying the “chair angle”.

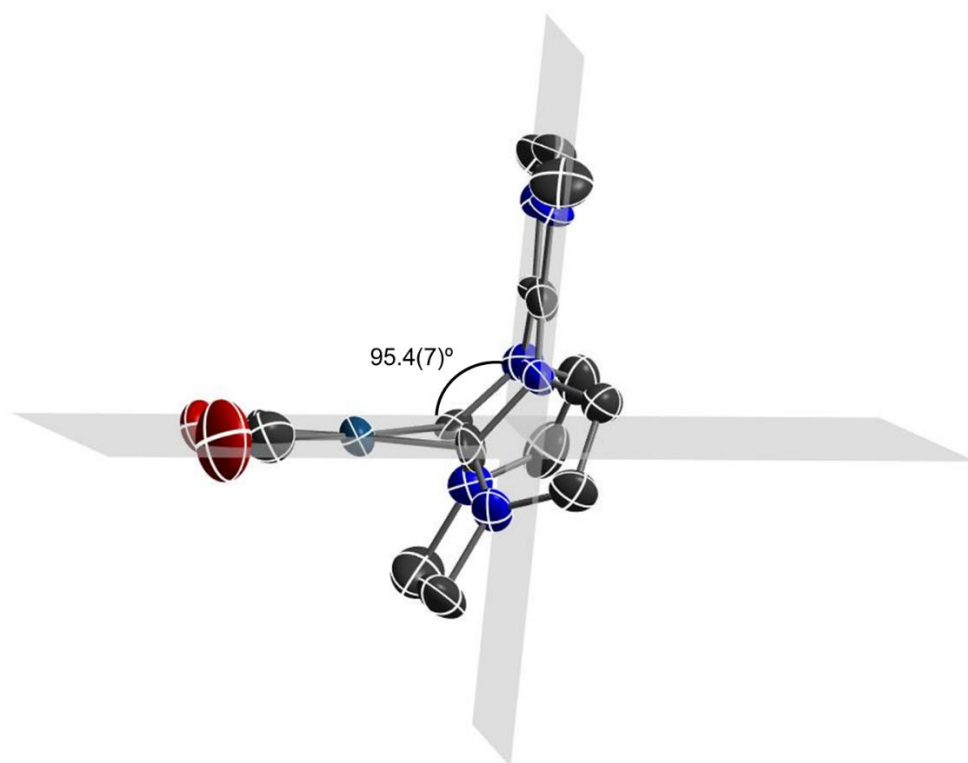

**Figure S22.** Side-on view of the molecular structure of  $\text{MeIm-Ir}^{2+}$  displaying the “chair angle”.

CheckCIF on Platon on the crystallographic data of [MeC<sub>2</sub>H<sub>4</sub>-Ir][Br] shows A type alerts (PLAT971\_ALERT\_2\_A and PLAT972\_ALERT\_2\_A) concerning *larger than expected residual positive density maximum on the iridium and bromide locations*.

**RESPONSE:** It is normal to expect the largest residual electron density to be associated with heavy atom sites. While these are larger than expected residual, the data was checked for signs of twinning, using Platon, and no twin law was detected. Next, we have supporting characterizations to indicate that the iridium and bromide atoms have been correctly assigned. Finally, given the proximity to the heavy atoms, it is not likely that these peaks represent solvent, or other small molecules that have been missed.

Moreover, the structure model of [MeC<sub>2</sub>H<sub>4</sub>-Ir][Br] shows the following A alert after CheckCIF on Platon:

**PLAT434\_ALERT\_2\_A Short Inter HL..HL Contact Br1 ..Br1 (2.93 Å)**

**PLAT434\_ALERT\_2\_A Short Inter HL..HL Contact Br2 ..Br2 (2.91 Å)**

**RESPONSE:** The bromide ligand contains larger than expected residual density outside the atom locations, therefore, some close contacts between bromide ligands might be expected.

**Table S3.** Crystal data and structure refinement for MeIm-Ir<sup>2+</sup>.

|                                    |                                                                                               |
|------------------------------------|-----------------------------------------------------------------------------------------------|
| Identification code                | str2311_auto                                                                                  |
| Empirical formula                  | C <sub>18</sub> H <sub>23</sub> B <sub>2</sub> F <sub>8</sub> IrN <sub>6</sub> O <sub>3</sub> |
| Formula weight                     | 737.24                                                                                        |
| Temperature/K                      | 240(2)                                                                                        |
| Crystal system                     | monoclinic                                                                                    |
| Space group                        | P2 <sub>1</sub>                                                                               |
| a/Å                                | 10.3330(2)                                                                                    |
| b/Å                                | 10.8804(2)                                                                                    |
| c/Å                                | 12.1379(3)                                                                                    |
| α/°                                | 90                                                                                            |
| β/°                                | 106.579(2)                                                                                    |
| γ/°                                | 90                                                                                            |
| Volume/Å <sup>3</sup>              | 1307.90(5)                                                                                    |
| Z                                  | 2                                                                                             |
| ρ <sub>calc</sub> /cm <sup>3</sup> | 1.872                                                                                         |

|                                                |                                                               |
|------------------------------------------------|---------------------------------------------------------------|
| $\mu/\text{mm}^{-1}$                           | 10.712                                                        |
| F(000)                                         | 712.0                                                         |
| Crystal size/ $\text{mm}^3$                    | $0.371 \times 0.099 \times 0.071$                             |
| Radiation                                      | Cu K $\alpha$ ( $\lambda = 1.54184$ )                         |
| 2 $\Theta$ range for data collection/ $^\circ$ | 7.6 to 133.196                                                |
| Index ranges                                   | $-12 \leq h \leq 12, -9 \leq k \leq 12, -12 \leq l \leq 14$   |
| Reflections collected                          | 9457                                                          |
| Independent reflections                        | 3729 [ $R_{\text{int}} = 0.0194, R_{\text{sigma}} = 0.0202$ ] |
| Data/restraints/parameters                     | 3729/270/347                                                  |
| Goodness-of-fit on $F^2$                       | 1.040                                                         |
| Final R indexes [ $I \geq 2\sigma(I)$ ]        | $R_1 = 0.0329, wR_2 = 0.0879$                                 |
| Final R indexes [all data]                     | $R_1 = 0.0343, wR_2 = 0.0898$                                 |
| Largest diff. peak/hole / $e \text{ \AA}^{-3}$ | 1.44/-1.00                                                    |
| Flack parameter                                | 0.473(18)                                                     |

**Table S4.** Bond lengths for  $\text{MeIm-Ir}^{2+}$ .

| Atom | Atom | Length/ $\text{\AA}$ | Atom | Atom | Length/ $\text{\AA}$ |
|------|------|----------------------|------|------|----------------------|
| Ir1  | C3   | 1.93(2)              | C7   | C6   | 1.45(3)              |
| Ir1  | C2   | 2.06(2)              | N6   | C9   | 1.40(2)              |
| Ir1  | C4   | 1.89(3)              | N6   | C10  | 1.37(3)              |
| Ir1  | C1   | 2.12(2)              | N6   | C8   | 1.49(3)              |
| F7   | B2   | 1.334(13)            | N5   | C11  | 1.37(2)              |
| C3   | O2   | 1.08(3)              | N5   | C10  | 1.27(3)              |
| C2   | N2   | 1.33(3)              | N5   | C12  | 1.45(3)              |
| C2   | N1   | 1.40(2)              | C11  | C9   | 1.346(11)            |
| C4   | O1   | 1.14(4)              | F8   | B2   | 1.40(3)              |
| C1   | N3   | 1.40(2)              | F5   | B2   | 1.30(3)              |
| C1   | N4   | 1.24(3)              | F6   | B2   | 1.350(13)            |
| N3   | C7   | 1.32(3)              | F2   | B1   | 1.346(13)            |
| N3   | C9   | 1.39(3)              | F3   | B1   | 1.24(3)              |
| N2   | C11  | 1.39(3)              | F4   | B1   | 1.36(3)              |
| N2   | C13  | 1.45(3)              | B1   | F1   | 1.467(17)            |
| N4   | C5   | 1.46(3)              | C13  | C14  | 1.18(3)              |
| N4   | C6   | 1.41(3)              | C16  | C17  | 1.89(4)              |
| N1   | C15  | 1.49(3)              | C18  | C17  | 1.92(5)              |
| N1   | C14  | 1.38(3)              |      |      |                      |

**Table S5.** Bond angles for <sup>Me</sup>**Im-Ir**<sup>2+</sup>.

| Atom            | Atom            | Atom            | Angle/°   | Atom            | Atom            | Atom            | Angle/°   |
|-----------------|-----------------|-----------------|-----------|-----------------|-----------------|-----------------|-----------|
| C <sub>3</sub>  | Ir <sub>1</sub> | C <sub>2</sub>  | 88.8(11)  | C <sub>10</sub> | N <sub>6</sub>  | C <sub>9</sub>  | 105.1(16) |
| C <sub>3</sub>  | Ir <sub>1</sub> | C <sub>1</sub>  | 175.2(12) | C <sub>10</sub> | N <sub>6</sub>  | C <sub>8</sub>  | 128.5(16) |
| C <sub>2</sub>  | Ir <sub>1</sub> | C <sub>1</sub>  | 87.1(3)   | C <sub>11</sub> | N <sub>5</sub>  | C <sub>12</sub> | 127.6(18) |
| C <sub>4</sub>  | Ir <sub>1</sub> | C <sub>3</sub>  | 92.0(4)   | C <sub>10</sub> | N <sub>5</sub>  | C <sub>11</sub> | 109.7(17) |
| C <sub>4</sub>  | Ir <sub>1</sub> | C <sub>2</sub>  | 175.9(12) | C <sub>10</sub> | N <sub>5</sub>  | C <sub>12</sub> | 122.7(17) |
| C <sub>4</sub>  | Ir <sub>1</sub> | C <sub>1</sub>  | 92.2(13)  | N <sub>5</sub>  | C <sub>11</sub> | N <sub>2</sub>  | 126(2)    |
| O <sub>2</sub>  | C <sub>3</sub>  | Ir <sub>1</sub> | 178(2)    | C <sub>9</sub>  | C <sub>11</sub> | N <sub>2</sub>  | 126(2)    |
| N <sub>2</sub>  | C <sub>2</sub>  | Ir <sub>1</sub> | 128.4(14) | C <sub>9</sub>  | C <sub>11</sub> | N <sub>5</sub>  | 108(2)    |
| N <sub>2</sub>  | C <sub>2</sub>  | N <sub>1</sub>  | 101.9(18) | N <sub>3</sub>  | C <sub>9</sub>  | N <sub>6</sub>  | 120.6(18) |
| N <sub>1</sub>  | C <sub>2</sub>  | Ir <sub>1</sub> | 129.2(15) | C <sub>11</sub> | C <sub>9</sub>  | N <sub>3</sub>  | 132(2)    |
| O <sub>1</sub>  | C <sub>4</sub>  | Ir <sub>1</sub> | 174(3)    | C <sub>11</sub> | C <sub>9</sub>  | N <sub>6</sub>  | 107(2)    |
| N <sub>3</sub>  | C <sub>1</sub>  | Ir <sub>1</sub> | 121.8(15) | N <sub>5</sub>  | C <sub>10</sub> | N <sub>6</sub>  | 110.4(6)  |
| N <sub>4</sub>  | C <sub>1</sub>  | Ir <sub>1</sub> | 130.7(16) | F <sub>7</sub>  | B <sub>2</sub>  | F <sub>8</sub>  | 103.1(18) |
| N <sub>4</sub>  | C <sub>1</sub>  | N <sub>3</sub>  | 107.4(19) | F <sub>7</sub>  | B <sub>2</sub>  | F <sub>6</sub>  | 102.8(12) |
| C <sub>7</sub>  | N <sub>3</sub>  | C <sub>1</sub>  | 109.8(16) | F <sub>5</sub>  | B <sub>2</sub>  | F <sub>7</sub>  | 118(2)    |
| C <sub>7</sub>  | N <sub>3</sub>  | C <sub>9</sub>  | 125.7(16) | F <sub>5</sub>  | B <sub>2</sub>  | F <sub>8</sub>  | 114.0(9)  |
| C <sub>9</sub>  | N <sub>3</sub>  | C <sub>1</sub>  | 123.8(17) | F <sub>5</sub>  | B <sub>2</sub>  | F <sub>6</sub>  | 108.8(19) |
| C <sub>2</sub>  | N <sub>2</sub>  | C <sub>11</sub> | 121.4(16) | F <sub>6</sub>  | B <sub>2</sub>  | F <sub>8</sub>  | 110(2)    |
| C <sub>2</sub>  | N <sub>2</sub>  | C <sub>13</sub> | 110.7(16) | F <sub>2</sub>  | B <sub>1</sub>  | F <sub>4</sub>  | 111(3)    |
| C <sub>11</sub> | N <sub>2</sub>  | C <sub>13</sub> | 127.9(17) | F <sub>2</sub>  | B <sub>1</sub>  | F <sub>1</sub>  | 105.4(10) |
| C <sub>1</sub>  | N <sub>4</sub>  | C <sub>5</sub>  | 127.4(19) | F <sub>3</sub>  | B <sub>1</sub>  | F <sub>2</sub>  | 119.2(19) |
| C <sub>1</sub>  | N <sub>4</sub>  | C <sub>6</sub>  | 113.6(17) | F <sub>3</sub>  | B <sub>1</sub>  | F <sub>4</sub>  | 114.4(13) |
| C <sub>6</sub>  | N <sub>4</sub>  | C <sub>5</sub>  | 118.8(18) | F <sub>3</sub>  | B <sub>1</sub>  | F <sub>1</sub>  | 118(2)    |
| C <sub>2</sub>  | N <sub>1</sub>  | C <sub>15</sub> | 122.0(18) | F <sub>4</sub>  | B <sub>1</sub>  | F <sub>1</sub>  | 82.8(17)  |
| C <sub>14</sub> | N <sub>1</sub>  | C <sub>2</sub>  | 108.1(17) | N <sub>4</sub>  | C <sub>6</sub>  | C <sub>7</sub>  | 102.4(18) |
| C <sub>14</sub> | N <sub>1</sub>  | C <sub>15</sub> | 130.0(18) | C <sub>14</sub> | C <sub>13</sub> | N <sub>2</sub>  | 106(2)    |
| N <sub>3</sub>  | C <sub>7</sub>  | C <sub>6</sub>  | 106.7(17) | C <sub>13</sub> | C <sub>14</sub> | N <sub>1</sub>  | 113(2)    |
| C <sub>9</sub>  | N <sub>6</sub>  | C <sub>8</sub>  | 126.3(18) | C <sub>16</sub> | C <sub>17</sub> | C <sub>18</sub> | 80.1(18)  |

**Table S6.** Crystal data and structure refinement <sup>Me</sup>**Ph-Ir**<sup>+</sup>.

|                     |                                                                                  |
|---------------------|----------------------------------------------------------------------------------|
| Identification code | str2297_autored                                                                  |
| Empirical formula   | C <sub>22</sub> H <sub>26</sub> F <sub>6</sub> IrN <sub>4</sub> O <sub>4</sub> P |
| Formula weight      | 747.64                                                                           |
| Temperature/K       | 149.9(3)                                                                         |
| Crystal system      | monoclinic                                                                       |
| Space group         | P2 <sub>1</sub> /c                                                               |
| a/Å                 | 9.6538(3)                                                                        |
| b/Å                 | 27.3149(8)                                                                       |



|                                                |                                                               |
|------------------------------------------------|---------------------------------------------------------------|
| c/Å                                            | 10.2280(3)                                                    |
| $\alpha/^\circ$                                | 90                                                            |
| $\beta/^\circ$                                 | 90.034(3)                                                     |
| $\gamma/^\circ$                                | 90                                                            |
| Volume/Å <sup>3</sup>                          | 2697.05(14)                                                   |
| Z                                              | 4                                                             |
| $\rho_{\text{calc}}/\text{cm}^3$               | 1.841                                                         |
| $\mu/\text{mm}^{-1}$                           | 10.852                                                        |
| F(000)                                         | 1456.0                                                        |
| Crystal size/mm <sup>3</sup>                   | $0.2 \times 0.137 \times 0.044$                               |
| Radiation                                      | Cu K $\alpha$ ( $\lambda = 1.54184$ )                         |
| 2 $\theta$ range for data collection/ $^\circ$ | 8.646 to 117.83                                               |
| Index ranges                                   | $-9 \leq h \leq 10, -28 \leq k \leq 30, -11 \leq l \leq 11$   |
| Reflections collected                          | 12867                                                         |
| Independent reflections                        | 3732 [ $R_{\text{int}} = 0.0409, R_{\text{sigma}} = 0.0322$ ] |
| Data/restraints/parameters                     | 3732/0/350                                                    |
| Goodness-of-fit on $F^2$                       | 1.061                                                         |
| Final R indexes [ $I \geq 2\sigma(I)$ ]        | $R_1 = 0.0340, wR_2 = 0.0899$                                 |
| Final R indexes [all data]                     | $R_1 = 0.0354, wR_2 = 0.0923$                                 |
| Largest diff. peak/hole / e Å <sup>-3</sup>    | 1.86/-1.58                                                    |

**Table S7.** Bond lengths for **MePh-Ir<sup>+</sup>**.

| Atom | Atom | Length/Å  | Atom | Atom | Length/Å  |
|------|------|-----------|------|------|-----------|
| Ir1  | C2   | 2.063(8)  | C15  | C14  | 1.338(13) |
| Ir1  | C1   | 2.087(7)  | C14  | N2   | 1.363(10) |
| Ir1  | C4   | 1.898(10) | C1   | N3   | 1.334(10) |
| Ir1  | C3   | 1.877(12) | C1   | N4   | 1.343(9)  |
| P1   | F4   | 1.591(5)  | N3   | C7   | 1.383(10) |
| P1   | F2   | 1.604(4)  | N3   | C8   | 1.425(10) |
| P1   | F5   | 1.577(5)  | N2   | C13  | 1.443(10) |
| P1   | F1   | 1.577(5)  | N4   | C5   | 1.459(10) |
| P1   | F3   | 1.591(6)  | N4   | C6   | 1.377(10) |
| P1   | F6   | 1.605(5)  | C7   | C6   | 1.349(12) |
| C12  | C11  | 1.395(13) | O1   | C3   | 1.142(13) |
| C12  | C13  | 1.380(13) | C4   | O2   | 1.132(11) |
| C11  | C10  | 1.362(14) | C13  | C8   | 1.388(12) |
| C2   | N1   | 1.347(10) | O4   | C18  | 1.179(9)  |
| C2   | N2   | 1.361(11) | C19  | C18  | 1.509(10) |
| N1   | C15  | 1.381(10) | C18  | C17  | 1.482(11) |
| N1   | C16  | 1.460(11) | C21  | C22  | 1.479(12) |

**Table S7.** Bond lengths for <sup>Me</sup>Ph-Ir<sup>+</sup>.

| Atom Atom Length/Å |     |           | Atom Atom Length/Å |     |           |
|--------------------|-----|-----------|--------------------|-----|-----------|
| C9                 | C10 | 1.393(14) | C21                | O3  | 1.168(14) |
| C9                 | C8  | 1.392(13) | C21                | C20 | 1.453(15) |

**Table S8.** Bond angles for <sup>Me</sup>Ph-Ir<sup>+</sup>.

| Atom | Atom | Atom | Angle/°  | Atom | Atom | Atom | Angle/°   |
|------|------|------|----------|------|------|------|-----------|
| C2   | Ir1  | C1   | 82.9(2)  | C14  | C15  | N1   | 106.5(7)  |
| C4   | Ir1  | C2   | 177.0(4) | C15  | C14  | N2   | 106.9(7)  |
| C4   | Ir1  | C1   | 94.1(4)  | N3   | C1   | Ir1  | 124.5(5)  |
| C3   | Ir1  | C2   | 92.7(4)  | N3   | C1   | N4   | 106.5(6)  |
| C3   | Ir1  | C1   | 175.5(4) | N4   | C1   | Ir1  | 128.9(5)  |
| C3   | Ir1  | C4   | 90.2(4)  | C1   | N3   | C7   | 109.8(6)  |
| F4   | P1   | F2   | 89.8(3)  | C1   | N3   | C8   | 126.6(7)  |
| F4   | P1   | F6   | 88.9(4)  | C7   | N3   | C8   | 123.5(7)  |
| F2   | P1   | F6   | 89.3(3)  | C2   | N2   | C14  | 111.7(7)  |
| F5   | P1   | F4   | 89.0(3)  | C2   | N2   | C13  | 123.7(7)  |
| F5   | P1   | F2   | 178.7(3) | C14  | N2   | C13  | 124.5(7)  |
| F5   | P1   | F3   | 89.9(3)  | C1   | N4   | C5   | 125.8(7)  |
| F5   | P1   | F6   | 91.2(3)  | C1   | N4   | C6   | 110.0(6)  |
| F1   | P1   | F4   | 179.1(4) | C6   | N4   | C5   | 124.1(6)  |
| F1   | P1   | F2   | 89.5(3)  | C6   | C7   | N3   | 106.9(7)  |
| F1   | P1   | F5   | 91.7(3)  | O2   | C4   | Ir1  | 179.4(9)  |
| F1   | P1   | F3   | 90.3(4)  | O1   | C3   | Ir1  | 177.2(10) |
| F1   | P1   | F6   | 90.5(3)  | C7   | C6   | N4   | 106.6(7)  |
| F3   | P1   | F4   | 90.3(4)  | C12  | C13  | N2   | 117.2(9)  |
| F3   | P1   | F2   | 89.5(3)  | C12  | C13  | C8   | 121.2(8)  |
| F3   | P1   | F6   | 178.6(4) | C8   | C13  | N2   | 121.4(9)  |
| C13  | C12  | C11  | 119.9(9) | C9   | C8   | N3   | 118.9(9)  |
| C10  | C11  | C12  | 119.1(9) | C13  | C8   | C9   | 118.5(8)  |
| N1   | C2   | Ir1  | 130.1(6) | C13  | C8   | N3   | 122.5(9)  |
| N1   | C2   | N2   | 103.4(7) | O4   | C18  | C19  | 121.0(7)  |
| N2   | C2   | Ir1  | 126.4(5) | O4   | C18  | C17  | 123.3(7)  |
| C2   | N1   | C15  | 111.5(6) | C17  | C18  | C19  | 115.6(6)  |
| C2   | N1   | C16  | 124.7(7) | O3   | C21  | C22  | 121.4(10) |
| C15  | N1   | C16  | 123.6(7) | O3   | C21  | C20  | 118.5(10) |
| C8   | C9   | C10  | 119.7(9) | C20  | C21  | C22  | 119.9(10) |
| C11  | C10  | C9   | 121.5(9) |      |      |      |           |

**Table S9.** Crystal data and structure refinement for [MeC<sub>2</sub>H<sub>4</sub>-Ir][Br].

|                                             |                                                                        |
|---------------------------------------------|------------------------------------------------------------------------|
| Identification code                         | 24PFA001                                                               |
| Empirical formula                           | C <sub>19.75</sub> H <sub>32.6</sub> BrIrN <sub>4</sub> O <sub>2</sub> |
| Formula weight                              | 630.21                                                                 |
| Temperature/K                               | 100.00                                                                 |
| Crystal system                              | monoclinic                                                             |
| Space group                                 | P2/n                                                                   |
| a/Å                                         | 15.8821(15)                                                            |
| b/Å                                         | 10.1194(9)                                                             |
| c/Å                                         | 24.188(2)                                                              |
| α/°                                         | 90                                                                     |
| β/°                                         | 101.932(4)                                                             |
| γ/°                                         | 90                                                                     |
| Volume/Å <sup>3</sup>                       | 3803.5(6)                                                              |
| Z                                           | 8                                                                      |
| ρ <sub>calc</sub> /g/cm <sup>3</sup>        | 2.201                                                                  |
| μ/mm <sup>-1</sup>                          | 9.148                                                                  |
| F(000)                                      | 2457.0                                                                 |
| Crystal size/mm <sup>3</sup>                | 0.12 × 0.04 × 0.03                                                     |
| Radiation                                   | MoKα (λ = 0.71073)                                                     |
| 2Θ range for data collection/°              | 4.378 to 72.636                                                        |
| Index ranges                                | -26 ≤ h ≤ 26, -16 ≤ k ≤ 16, -40 ≤ l ≤ 40                               |
| Reflections collected                       | 355155                                                                 |
| Independent reflections                     | 18462 [R <sub>int</sub> = 0.0834, R <sub>sigma</sub> = 0.0292]         |
| Data/restraints/parameters                  | 18462/0/365                                                            |
| Goodness-of-fit on F <sup>2</sup>           | 1.044                                                                  |
| Final R indexes [I ≥ 2σ (I)]                | R <sub>1</sub> = 0.0565, wR <sub>2</sub> = 0.1671                      |
| Final R indexes [all data]                  | R <sub>1</sub> = 0.0711, wR <sub>2</sub> = 0.1772                      |
| Largest diff. peak/hole / e Å <sup>-3</sup> | 8.02/-3.97                                                             |

**Table S10.** Bond lengths for [MeC<sub>2</sub>H<sub>4</sub>-Ir][Br].

| Atom | Atom | Length/Å  | Atom | Atom | Length/Å |
|------|------|-----------|------|------|----------|
| Ir1  | C1   | 2.068(5)  | N6   | C22  | 1.464(9) |
| Ir1  | C2   | 2.070(6)  | N7   | C21  | 1.476(9) |
| Ir1  | C3   | 1.886(7)  | N7   | C14  | 1.351(8) |
| Ir1  | C4   | 1.887(6)  | N7   | C20  | 1.384(9) |
| Ir1  | Br1  | 2.9841(6) | N1   | C2   | 1.373(8) |
| Ir2  | C15  | 2.100(5)  | N1   | C13  | 1.472(9) |
| Ir2  | C17  | 1.884(7)  | N1   | C12  | 1.378(9) |
| Ir2  | C14  | 2.055(6)  | N2   | C2   | 1.358(8) |

**Table S10.** Bond lengths for [MeC<sub>2</sub>H<sub>4</sub>-Ir][Br].

| Atom | Atom | Length/Å  | Atom | Atom | Length/Å  |
|------|------|-----------|------|------|-----------|
| Ir2  | C16  | 1.908(6)  | N2   | C10  | 1.482(9)  |
| Ir2  | Br2  | 2.9982(6) | N2   | C11  | 1.376(9)  |
| N4   | C1   | 1.344(8)  | N8   | C19  | 1.377(9)  |
| N4   | C6   | 1.392(8)  | N8   | C14  | 1.348(8)  |
| N4   | C5   | 1.454(8)  | N8   | C18  | 1.473(9)  |
| O4   | C17  | 1.134(8)  | C23  | C24  | 1.338(10) |
| N5   | C15  | 1.350(8)  | C6   | C7   | 1.351(11) |
| N5   | C25  | 1.464(8)  | C19  | C20  | 1.330(12) |
| N5   | C24  | 1.386(8)  | C22  | C21  | 1.477(9)  |
| N3   | C1   | 1.362(7)  | C9   | C10  | 1.500(10) |
| N3   | C7   | 1.380(9)  | C11  | C12  | 1.326(11) |
| N3   | C9   | 1.472(9)  | C3   | O1   | 1.147(8)  |
| N6   | C15  | 1.358(8)  | O2   | C4   | 1.143(8)  |
| N6   | C23  | 1.383(8)  | O3   | C16  | 1.139(8)  |

**Table S11.** Bond angles for [MeC<sub>2</sub>H<sub>4</sub>-Ir][Br].

| Atom | Atom | Atom | Angle/°    | Atom | Atom | Atom | Angle/°  |
|------|------|------|------------|------|------|------|----------|
| C1   | Ir1  | C2   | 85.1(2)    | N5   | C15  | N6   | 104.7(5) |
| C1   | Ir1  | Br1  | 105.31(16) | N6   | C15  | Ir2  | 130.9(4) |
| C2   | Ir1  | Br1  | 105.63(16) | C14  | N7   | C21  | 121.6(6) |
| C3   | Ir1  | C1   | 179.1(3)   | C14  | N7   | C20  | 110.2(6) |
| C3   | Ir1  | C2   | 94.2(3)    | C20  | N7   | C21  | 128.2(6) |
| C3   | Ir1  | C4   | 91.5(3)    | C2   | N1   | C13  | 125.4(5) |
| C3   | Ir1  | Br1  | 75.4(2)    | C2   | N1   | C12  | 111.2(5) |
| C4   | Ir1  | C1   | 89.1(2)    | C12  | N1   | C13  | 123.3(6) |
| C4   | Ir1  | C2   | 172.4(2)   | C2   | N2   | C10  | 130.6(6) |
| C4   | Ir1  | Br1  | 80.69(19)  | C2   | N2   | C11  | 111.4(6) |
| C15  | Ir2  | Br2  | 109.50(16) | C11  | N2   | C10  | 118.0(6) |
| C17  | Ir2  | C15  | 176.4(3)   | C19  | N8   | C18  | 125.5(6) |
| C17  | Ir2  | C14  | 92.3(3)    | C14  | N8   | C19  | 110.1(6) |
| C17  | Ir2  | C16  | 92.4(3)    | C14  | N8   | C18  | 124.3(6) |
| C17  | Ir2  | Br2  | 73.7(2)    | N1   | C2   | Ir1  | 124.6(4) |
| C14  | Ir2  | C15  | 85.4(2)    | N2   | C2   | Ir1  | 132.1(4) |
| C14  | Ir2  | Br2  | 102.14(17) | N2   | C2   | N1   | 103.1(5) |
| C16  | Ir2  | C15  | 89.8(2)    | C24  | C23  | N6   | 108.1(5) |
| C16  | Ir2  | C14  | 175.2(2)   | C7   | C6   | N4   | 107.1(6) |
| C16  | Ir2  | Br2  | 80.08(19)  | O4   | C17  | Ir2  | 178.6(7) |
| C1   | N4   | C6   | 110.1(5)   | C23  | C24  | N5   | 105.7(6) |

**Table S11.** Bond angles for [MeC<sub>2</sub>H<sub>4</sub>-Ir][Br].

| Atom | Atom | Atom | Angle/°  | Atom | Atom | Atom | Angle/°  |
|------|------|------|----------|------|------|------|----------|
| C1   | N4   | C5   | 125.8(5) | C6   | C7   | N3   | 106.7(5) |
| C6   | N4   | C5   | 124.0(6) | C20  | C19  | N8   | 107.6(7) |
| C15  | N5   | C25  | 126.6(5) | N6   | C22  | C21  | 116.5(5) |
| C15  | N5   | C24  | 111.6(5) | N7   | C21  | C22  | 113.2(6) |
| C24  | N5   | C25  | 121.6(5) | N3   | C9   | C10  | 114.4(6) |
| C1   | N3   | C7   | 110.5(6) | N7   | C14  | Ir2  | 123.0(5) |
| C1   | N3   | C9   | 121.6(5) | N8   | C14  | Ir2  | 131.4(4) |
| C7   | N3   | C9   | 127.9(6) | N8   | C14  | N7   | 105.3(5) |
| C15  | N6   | C23  | 110.0(5) | C19  | C20  | N7   | 106.8(6) |
| C15  | N6   | C22  | 131.3(5) | N2   | C10  | C9   | 116.8(6) |
| C23  | N6   | C22  | 118.7(5) | C12  | C11  | N2   | 107.4(6) |
| N4   | C1   | Ir1  | 130.3(4) | C11  | C12  | N1   | 106.8(6) |
| N4   | C1   | N3   | 105.6(5) | O1   | C3   | Ir1  | 178.2(7) |
| N3   | C1   | Ir1  | 124.1(4) | O2   | C4   | Ir1  | 176.4(6) |
| N5   | C15  | Ir2  | 124.4(4) | O3   | C16  | Ir2  | 178.3(6) |

## 7. References

- [1] A. M. Borys, *Organometallics* **2023**, *42*, 182–196.
- [2] M. Monticelli, C. Tubaro, M. Baron, M. Basato, P. Sgarbossa, C. Graiff, G. Accorsi, T. P. Pell, D. J. D. Wilson, P. J. Barnard, *Dalton Transactions* **2016**, *45*, 9540–9552.
- [3] M. Lee, Z. Niu, C. Slebodnick, H. W. Gibson, *Journal of Physical Chemistry B* **2010**, *114*, 7312–7319.
- [4] J. L. Herde, J. C. Lambert, C. V. Senoff, M. A. Cushing, in *Inorganic Syntheses*, **1974**, pp. 18–20.
- [5] S. Gonell, M. Poyatos, J. A. Mata, E. Peris, *Organometallics* **2012**, *31*, 5606–5614.
- [6] G. R. Fulmer, A. J. M. Miller, N. H. Sherden, H. E. Gottlieb, A. Nudelman, B. M. Stoltz, J. E. Bercaw, K. I. Goldberg, *Organometallics* **2010**, *29*, 2176–2179.
- [7] G. M. Sheldrick, *Acta Crystallogr C Struct Chem* **2015**, *71*, 3–8.
- [8] O. V. Dolomanov, L. J. Bourhis, R. J. Gildea, J. A. K. Howard, H. Puschmann, *J Appl Crystallogr* **2009**, *42*, 339–341.
